# Supplementary material for: Future health providers’ willingness to provide abortion services following decriminalisation of abortion in Chile: a cross-sectional survey
Source: PubMed Central journal article supplement — BMJ Open. 2019 Oct 30;9(10):e030797. doi: 10.1136/bmjopen-2019-030797 (PMC6830615; doi:10.1136/bmjopen-2019-030797), 2019-10-30
Supplement: bmjopen-2019-030797.draft_revisions.pdf [file bmjopen-2019-030797.draft_revisions.pdf]

# BMJ Open

BMJ Open is committed to open peer review. As part of this commitment we make the peer review history of every article we publish publicly available.

When an article is published we post the peer reviewers' comments and the authors' responses online. We also post the versions of the paper that were used during peer review. These are the versions that the peer review comments apply to.

The versions of the paper that follow are the versions that were submitted during the peer review process. They are not the versions of record or the final published versions. They should not be cited or distributed as the published version of this manuscript.

BMJ Open is an open access journal and the full, final, typeset and author-corrected version of record of the manuscript is available on our site with no access controls, subscription charges or pay-per-view fees (<http://bmjopen.bmj.com>).

If you have any questions on BMJ Open's open peer review process please email [info.bmjopen@bmj.com](mailto:info.bmjopen@bmj.com)

# BMJ Open

## Future women's health providers' willingness to provide abortion services following decriminalization of abortion in Chile: a cross-sectional survey

|                               |                                                                                                                                                                                                                                                                                                                                                                                                                                                                                                                                                                                                                   |
|-------------------------------|-------------------------------------------------------------------------------------------------------------------------------------------------------------------------------------------------------------------------------------------------------------------------------------------------------------------------------------------------------------------------------------------------------------------------------------------------------------------------------------------------------------------------------------------------------------------------------------------------------------------|
| Journal:                      | <i>BMJ Open</i>                                                                                                                                                                                                                                                                                                                                                                                                                                                                                                                                                                                                   |
| Manuscript ID                 | bmjopen-2019-030797                                                                                                                                                                                                                                                                                                                                                                                                                                                                                                                                                                                               |
| Article Type:                 | Research                                                                                                                                                                                                                                                                                                                                                                                                                                                                                                                                                                                                          |
| Date Submitted by the Author: | 02-Apr-2019                                                                                                                                                                                                                                                                                                                                                                                                                                                                                                                                                                                                       |
| Complete List of Authors:     | Biggs, M. Antonia; University of California, San Francisco, Advancing New Standards in Reproductive Health<br>Casas, Lidia; Universidad Diego Portales, Human Rights Center, School of Law,<br>Ramm, Alejandra; Universidad Diego Portales, Instituto de Investigacion en Ciencias Sociales<br>Baba, C. Finley; University of California, San Francisco, Advancing New Standards in Reproductive Health<br>Correa, Sara; Universidad Diego Portales, Instituto de Investigacion en Ciencias Sociales<br>Grossman, Daniel; University of California, San Francisco, Advancing New Standards in Reproductive Health |
| Keywords:                     | abortion, Chile, midifery, obstetrics, MEDICAL EDUCATION & TRAINING                                                                                                                                                                                                                                                                                                                                                                                                                                                                                                                                               |
|                               |                                                                                                                                                                                                                                                                                                                                                                                                                                                                                                                                                                                                                   |

SCHOLARONE™  
Manuscripts

1  
2  
3 **Title:** Future women's health providers' willingness to provide abortion services following  
4  
5 decriminalization of abortion in Chile: a cross-sectional survey  
6

7 M. Antonia Biggs<sup>a,d</sup>, Lidia Casas<sup>b</sup>, Alejandra Ramm<sup>c</sup>, Finley Baba<sup>a</sup>, Sara Correa<sup>c</sup>, Daniel Grossman<sup>a</sup>  
8  
9

10 <sup>a</sup>Advancing New Standards in Reproductive Health (ANSIRH), Bixby Center for Global Reproductive  
11  
12 Health, Department of Obstetrics, Gynecology and Reproductive Sciences, University of California, San  
13  
14 Francisco  
15

16 <sup>b</sup>Human Rights Center School of Law, University of Diego Portales  
17

18 <sup>c</sup>Institute of Social Science Research (ICSO), University of Diego Portales  
19

20  
21 <sup>d</sup>Corresponding author, University of California, San Francisco, 1330 Broadway, Suite 1100, Oakland, CA  
22  
23 94612 USA phone:1-510-986-8961; email: [antonia.biggs@ucsf.edu](mailto:antonia.biggs@ucsf.edu)  
24  
25

26  
27  
28 **Funding:** This work was supported by a grant from the University of California, San Francisco (UCSF),  
29  
30 National Center of Excellence in Women's Health and an anonymous foundation. Its contents are solely  
31  
32 the responsibility of the authors and do not necessarily represent the official views of the funders. The  
33  
34 funders had no role in the study design, analysis, or interpretation of the findings.  
35  
36

37 **Article type:** Original article  
38

39 **Keywords:** abortion; medical students; midwifery students; Chile  
40

41  
42 **Author contributions:** MAB and LC conceived and designed the study and obtained funding. AR, FB, and  
43  
44 SC participated in study planning, site recruitment, review of data collection instruments, and conducted  
45  
46 data collection. MAB conducted all data analyses and drafted the manuscript. DG helped to obtain  
47  
48 funding. All authors revised and approved the final manuscript.  
49

50  
51 **Conflicts of interest:** All authors state they have no financial conflicts of interest.  
52  
53  
54  
55  
56  
57  
58  
59  
60

### Strengths and limitations of this study

- This study assesses Chilean medical and midwifery student's willingness and concerns about providing abortion services soon after the complete ban on abortion was lifted.
- We capture a range in students' views about abortion provision by successfully recruiting students from secular, religious, public and private universities and by reaching students seeking either medical and midwifery degrees.
- This study includes important explanatory variables including political affiliation, religion, frequency of attendance at religious services and year in medical or midwifery school.
- Students from religious universities were underrepresented and our response rate was low. Thus, the views presented here are likely more supportive of abortion than medical and midwifery students across the country.

## Abstract

**Objective:** To assess Chilean medical and midwifery students' attitudes and willingness to provide abortion care, shortly after abortion was decriminalized.

**Design:** From October 2017 to May 2018, we fielded a cross-sectional, web-based survey regarding students' attitudes and willingness to provide abortion-related care. We used generalized estimating equations to assess differences by university and the type of degree sought.

**Setting:** A combination of seven secular, religiously-affiliated, public and private universities that offer midwifery or medical degrees with a specialization in obstetrics and gynecology, located in Santiago, Chile, served as recruitment sites.

**Participants:** All students seeking medical or midwifery degrees at one of seven universities were eligible to participate. We distributed the survey link to medical and midwifery students at these seven universities; 459 eligible students opened the survey link and 377 students completed the survey.

**Primary and secondary outcomes:** Intentions to provide abortion-related services is our primary outcome of interest. Secondary outcomes included moral views and concerns about abortion provision.

**Results:** Most students agreed that their university should train medical and midwifery students to provide abortion services (70%-78%), that they plan to become trained to provide abortion services (69%), and that providing abortions is a positive contribution to society (57%); 20% reported that they will not provide an abortion under any circumstance and 16% agreed that providing abortions is morally wrong. Secular university students reported higher intentions to provide abortion services, more favorable views and fewer concerns about abortion provision than students from religious universities.

**Conclusion:** Medical and midwifery students are interested in receiving training and providing abortion care, and believe their university should provide this training. Integrating high quality training in abortion care into medical and midwifery programs will be critical to ensuring that women receive timely, nonjudgmental and quality abortion care.

## Introduction

In August 2017, Chile's constitutional tribunal approved allowing abortion when the woman's life is in danger, lethal fetal anomaly, and for pregnancies due to rape. In the 1990s, when abortion was completely banned, abortion providers consisted of a mix of trained and untrained providers, many of whom had low levels of education and literacy, resulting in high rates of maternal mortality due to abortion.<sup>1</sup> During that period, practitioners reported a fear of prosecution when treating women with fetal or maternal complications<sup>2</sup>, which may in part explain why healthcare providers and hospitals have been responsible for filing the majority of cases against women who have abortions.<sup>3</sup> Since that time, maternal mortality due to abortion has decreased considerably,<sup>4</sup> owing to increased access to contraception, misoprostol, and higher quality post-abortion care.<sup>2,5</sup>

Legal reform introduces a new challenge and opportunity for prospective women's health providers. They must now consider whether or not they are willing to develop their skills in order to fill a critical service gap, in an environment that lacks experienced clinicians and has limited capacity to provide abortion services. The extent to which future providers welcome, reject, and/or are concerned about providing abortion-related care, now that it abortion is legally permissible, is unclear. This study aims to deepen our understanding of medical and midwifery students' attitudes, concerns, and willingness to provide abortion-related care, a critical step in identifying the country's future abortion training needs.

## Materials and Methods

### *Study design*

We conducted a cross-sectional survey of prospective women's health providers seeking medical or midwifery degrees at universities located in the metropolitan region of Santiago, Chile's capital. We powered our sample to detect mean differences in abortion attitudes by university type (secular vs religious university) and degree type (medical vs midwifery). We estimated that a sample of

1  
2  
3 300, with a minimum group size of 90, could detect a mean difference of 0.45, on a 4-point scale, and as  
4  
5 reported in a published abortion stigma subscale, with a standard deviation of 1.07, and a two-sided  
6  
7 alpha of 5% and 80% power.<sup>6</sup>  
8  
9

#### 10 *Recruitment procedures*

11  
12 We selected a combination of seven secular, religiously-affiliated, public and private universities  
13  
14 that offer midwifery or medical degrees with a specialization in obstetrics and gynecology, located in  
15  
16 Santiago, Chile, to serve as recruitment sites. This included seven medical and five midwifery  
17  
18 departments within these seven universities. Based on a review of the Ministry of Education and  
19  
20 university websites, we estimated that the seven participating universities serve over 7,000 students  
21  
22 seeking these degrees. We requested department administrators and student leaders to distribute a  
23  
24 survey link to their medical and midwifery students. Six departments at four universities shared the link  
25  
26 with students directly, through student listservs or department Facebook pages. At the two non-  
27  
28 responding universities, we distributed paper flyers that included the survey link and a QR code to  
29  
30 medical and midwifery students. Interested participants were entered into a gift card drawing (worth  
31  
32 \$40 USD/24,000 Chilean pesos) of 25 randomly-selected winners. The study protocol received ethical  
33  
34 approval from the University of Diego Portales, Santiago, Chile.  
35  
36  
37  
38

#### 39 *Survey administration*

40  
41 We fielded a web-based, anonymous survey from October 2017 to May 2018. Students seeking  
42  
43 a medical or midwifery degree at one of the seven identified universities were eligible to participate.  
44  
45 Interested students reviewed an online consent form, consented, and completed the survey. The survey  
46  
47 assessed students' moral views,<sup>7</sup> intentions,<sup>8</sup> and concerns about providing abortion,<sup>9</sup> which were drawn  
48  
49 from the published literature, and adapted to be applicable to university students and in a context in  
50  
51 which provision of abortion had not been previously legal.  
52  
53  
54  
55  
56  
57  
58  
59  
60

### *Patient and public involvement*

Prior to developing the student survey, we conducted 30 in-depth qualitative in-person interviews with clinical teaching faculty at the same seven universities where we intended to survey students, and within the schools' OB/GYN and midwifery departments. Findings from the faculty interviews, informed the development of the research questions and the development of the student survey. A summary of the findings from faculty and students has been at several medical schools and reproductive health professionals. We did not include patient involvement in the design of this study.

### *Outcome variables*

We examined five outcomes related to three abortion-provision domains. Concerns about abortion provision included: "Now that abortion is legal in certain circumstances, to what extent do the following factors related to abortion provision concern you?" Followed by seven, likert-scaled (1-strongly disagree to 5-strongly agree) items: "It is against my personal values", "I fear that I would have legal problems", "It is against my religious beliefs", "It is outside my scope of practice", "I fear that either I or my family may be harassed and/or threatened by others", "I may be ostracized by my colleagues and/or discriminated against in my profession", and "I fear being rejected by my family or friends". Average scores across items served as our *concerns about abortion provision* outcome. *Having one or more concern* served as a dichotomous outcome which included anyone who agreed or strongly agreed with any of these seven items. Moral views about abortion provision included respondents' level of agreement (1-strongly disagree to 5-strongly agree) with five items: "The needs of a patient are more important than the beliefs of a clinician", "Abortion should be covered as part of public health services", "Providing abortions is a positive contribution to society", "Clinicians have a responsibility to counsel patients against having an abortion" and "I feel that providing abortions is morally wrong". After reverse coding the latter two items, average scores across items served as a continuous *morally favorable views about abortion provision* outcome. For intentions to provide abortion-related services



1  
2  
3 participants were asked “Now that abortion is legal in some circumstances, how do you think this will  
4 affect your future practice?”, and to indicate their level of agreement (1-strongly disagree to 4-strongly  
5 agree) with four items: “I plan to become trained to provide abortion services”, “I will try to convince  
6 other doctors to provide abortions”, “If a female patient requested an abortion, I would try to  
7 discourage her from seeking the procedure”, and “I will not provide an abortion under any  
8 circumstance.” After reverse coding the latter two items, average scores served as one continuous  
9 outcome. Endorsement (agreed/strongly agreed) of *I plan to become trained to provide abortion*  
10 *services* served as final dichotomous outcome.

### 21 Independent variables

22  
23 Independent variables included university type (secular or religious), gender, age group, degree  
24 type (medicine-undecided specialty, medicine-obstetrics and gynecology specialty, and midwifery),  
25 political affiliation (none/center, right/center right, and left/center left), religion (Catholic or other  
26 religion vs none/atheist/agnostic), frequency of attendance to religions services, year in  
27 medical/midwifery school, region where student completed high school (Santiago vs other), and as a  
28 proxy for socioeconomic status, type of high school attended (public, private-subsidized, and private-  
29 self-paid).

### 39 Analyses

40  
41 We estimated frequencies for participant and university characteristics (Table 1) and each  
42 abortion provision domain, including their internal consistency Cronbach’s alpha reliability coefficients  
43 (Table 2). For multivariable models, we used linear and logistic general estimating equation (GEE)  
44 models accounting for clustering by university. To test associations between participant characteristics  
45 and our main outcomes, we selected model covariates known to be associated with abortion attitudes,  
46 based on the existing literature<sup>10</sup>. We conducted all analyses in STATA 14. Significance was reported  
47 at  $P \leq .05$ .

## Results

### Respondent characteristics

The survey link was distributed to 2,148 medical and midwifery students and 459 opened the survey link; we removed 46 surveys due to ineligibility, and 36 surveys that were less than 40% complete or were missing outcome data, leaving a final sample of 377 and a response rate of (18%, 377/2,148). There were no statistically significant differences by gender, religion, age, year in school, type of school, degree pursuit, or political affiliation between our final sample (n=377) and those with incomplete surveys (n=36). We describe student and university characteristics in Table 1. Most students attended a secular university (77%), 63% a private university, and 75% were seeking a medical degree (49% undecided specialty and 26% with specialization in obstetrics and gynecology). Most students felt that their university should provide abortion training to all medical students (70%), medical students with an Ob/Gyn specialty (79%), and to midwifery students (78%, Table 2). After removing all observations with missing outcome data, there were no missing data for any of the independent variables of interest. However, there were 68 missing responses for the question asking students if their university should provide abortion training to their students.

### Concerns, moral views and intentions to provide abortion-related services

Half (50%) of students agreed/strongly agreed that they had one or more concern about providing abortion-related services. Primary concerns included: providing abortion was against their personal values (32%) or religious beliefs (18%) and a fear of legal problems (23%, Table 3). Overall concerns about providing abortion-related services were significantly higher among students attending religious than those attending secular universities (mean 2.59 vs 1.84,  $p < .05$ ), with no statistically significant differences by the type of degree being pursued.

Over three-quarters (77%) of students agreed/strongly agreed that the needs of a patient are more important than the beliefs of a clinician, 61% agreed that abortion should be covered as part of

1  
2  
3 public health services, 57% agreed that providing abortions is a positive contribution to society, and 16%  
4  
5 agreed that providing abortions is morally wrong (Table 3). Students from secular universities were  
6  
7 significantly more likely to hold morally favorable views about abortion provision than students from  
8  
9 religious universities (mean 3.97 vs 2.92,  $p < .05$ ), with no statistically significant differences by type of  
10  
11 degree being pursued.  
12  
13

14        Nearly two-thirds (69%) of students agreed/strongly agreed that they plan to become trained to  
15  
16 provide abortion services but only 21% would try to convince other doctors to provide abortion services.  
17  
18 Approximately one in five students agreed that they would discourage a woman from seeking an  
19  
20 abortion (21%) and that they will not provide an abortion under any circumstance (20%). Students from  
21  
22 secular universities had significantly higher overall intentions to provide abortion-related services than  
23  
24 students from religious universities (mean 2.99 vs. 2.11,  $p < .05$ ). Medical students specializing in  
25  
26 obstetrics and gynecology (24%) were significantly ( $p < .05$ ) more likely than medical students who had  
27  
28 not yet decided on their specialty (10%) to agree they would try to discourage a patient from seeking an  
29  
30 abortion. Midwifery students (11%) were less likely than medical students (24%) to say they would try to  
31  
32 convince other doctors to provide abortions.  
33  
34  
35

36  
37        In multivariable analyses, factors associated with having one or more concern about abortion  
38  
39 provision included having a right/center right political affiliation (aOR 2.96, CI: 1.42, 6.19) and attending  
40  
41 religious services frequently (aOR 5.14, CI: 1.73, 15.26, Table 4). Factors associated with lower odds of  
42  
43 having concerns about abortion provision included attending a secular university (aOR 0.47, CI: 0.23,  
44  
45 0.95) and identifying as atheist, agnostic or of no religion (aOR 0.47, CI: 0.23, 0.95).  
46  
47

48        Factors associated with having morally favorable views about abortion provision included  
49  
50 attending a secular university (Beta 0.52, CI: 0.32, 0.72), being female (Beta 0.21, CI: 0.05, 0.37), having  
51  
52 completed their high school education in Santiago (Beta 0.19, CI: 0.02, 0.36), identifying as left/center  
53  
54 left political affiliation (Beta 0.23, CI: 0.05, 0.41), and being in the last few years of medical/midwifery  
55  
56  
57  
58  
59  
60

1  
2  
3 school (Beta 0.34, CI: 0.09, 0.58, Table 4). Those who identified as right/center right political affiliation  
4  
5 (Beta -0.52, CI: -0.72, -0.31) or attended religious services frequently (Beta -0.91, CI: -1.16, -0.65) were  
6  
7 less likely to hold morally favorable views about abortion provision.  
8

9  
10 Factors associated with overall intentions to provide abortion services and specifically having  
11  
12 plans to get trained to provide abortion services included attending a secular university (Beta 0.47, CI:  
13  
14 0.31, 0.63 and aOR 2.74, CI: 1.38, 5.43, respectively), having a left/center left political affiliation (Beta  
15  
16 0.20, CI: 0.06, 0.34 and aOR 2.22, CI: 1.01, 4.07), and being in the 3<sup>rd</sup> or 4<sup>th</sup> year in medical/midwifery  
17  
18 school (Beta 0.17, CI: 0.02, 0.33 and aOR 2.48, CI: 1.09, 5.28, Table 5). Identifying as atheist, agnostic or  
19  
20 of no religion was associated with higher overall intentions to provide abortion services (Beta 0.24, CI:  
21  
22 0.09, 0.39). Factors associated with fewer overall intentions and plans to become trained to provide  
23  
24 abortion services included being ages 25 and older (Beta -0.29, CI: -0.47, -0.10 and aOR 0.35, CI: 0.14,  
25  
26 0.87), having a right/center right political affiliation (Beta -0.42, CI: -0.58, -0.26 and aOR 0.45, CI: 0.22,  
27  
28 0.90), and attending religious services frequently (Beta -0.60, CI: -0.80, -0.40 and aOR 0.16, CI: 0.06,  
29  
30 0.41).  
31  
32  
33

### 34 **Discussion**

35  
36 Findings from this study highlight widespread support among prospective women's health  
37  
38 clinicians to build a qualified workforce to provide abortion services under the current law in Chile. The  
39  
40 vast majority of secular and over one-third of religiously-affiliated university students have intentions to  
41  
42 provide abortion services. Most students, even those at religious universities, felt that they should  
43  
44 receive abortion-related training and moral opposition to abortion was low. Religious university  
45  
46 students' desire to receive abortion training is in conflict with the position that their universities have  
47  
48 taken—to claim institutional-level refusals to provide abortion care at their hospitals.<sup>11 12</sup>  
49  
50  
51

52  
53 More than half (57%) of students believe providing abortion services is a positive contribution to  
54  
55 society and few (16%) thought that providing abortions is morally wrong. Holding morally favorable  
56  
57  
58  
59  
60

1  
2  
3 views about abortion provision was higher among students who were further along in their medical and  
4  
5 midwifery training suggesting that experience may impact students' willingness to provide such services.  
6  
7 However, participants' views and intentions to provide abortion services are likely to change even  
8  
9 further once they become practicing clinicians, as organizational barriers may deter interested clinicians  
10  
11 from abortion provision.<sup>13 14</sup>  
12  
13

14 Along with the high level of support and intentions to provide abortion services, over half of  
15  
16 students held concerns, mainly related to their personal values and religious beliefs, but also due to a  
17  
18 fear of legal problems and of being harassed or threatened. These concerns may be well-founded, as  
19  
20 evidenced by the public defaming of the physician who performed the first legal abortion in the  
21  
22 country.<sup>15</sup> Furthermore, the broad adoption of conscientious objector status among clinicians and  
23  
24 institutions<sup>16</sup> may be a product of and/or contributor to the stigma of being an abortion provider.  
25  
26 Clinicians in Chile may require extensive support professionally in order to ensure that they feel safe  
27  
28 providing abortion services to women.  
29  
30  
31

32 Consistent with numerous studies documenting the relationship between political views,  
33  
34 religiosity and abortion attitudes among medical students, clinicians, and the general public,<sup>17-19</sup> we  
35  
36 found that students' political affiliation and frequency of religious attendance was strongly associated  
37  
38 with students' moral views and willingness to provide abortion services. Students' religious beliefs are  
39  
40 likely to influence their clinical opinions and interactions, and thus they may benefit from training to  
41  
42 ensure that they are able to provide nonjudgmental services. Studies in the United States have found  
43  
44 that Ob/Gyn residents who were morally opposed to abortion but partially participated in an abortion  
45  
46 training program, felt they gained important clinical and professional skills from the abortion training.<sup>20</sup>  
47  
48  
49

50 <sup>21</sup> Whether medical and midwifery programs in Chile are prepared to offer abortion training, and  
51  
52 whether they will require their students to participate at some level, is still unclear.  
53  
54  
55  
56  
57  
58  
59  
60

1  
2  
3 While this study successfully reached students from secular and religious universities, students  
4  
5 from religious universities were underrepresented and our response rate was low. Thus, the views  
6  
7 presented here are likely more supportive of abortion than medical and midwifery students across the  
8  
9 country. Nonetheless, students' attitudes about abortion provision are similar to those reported among  
10  
11 obstetricians and gynecologists in Argentina,<sup>22</sup> a country that also has very restrictive abortion laws.  
12  
13

#### 14 **Conclusions**

15  
16 This is the first study to assess Chilean medical and midwifery student's willingness to provide  
17  
18 abortion services following legal reform. Students are interested in receiving training and providing  
19  
20 abortion care to women and believe their university should provide this training. Ensuring that high  
21  
22 quality training in abortion care is integrated within medical and midwifery programs will be critical to  
23  
24 ensuring that women receive timely, nonjudgmental and quality abortion care.  
25  
26  
27  
28  
29  
30  
31  
32  
33  
34  
35  
36  
37  
38  
39  
40  
41  
42  
43  
44  
45  
46  
47  
48  
49  
50  
51  
52  
53  
54  
55  
56  
57  
58  
59  
60

Table 1. Participant characteristics (N=377)

|                                                | N   | %  |
|------------------------------------------------|-----|----|
| <b>Gender</b>                                  |     |    |
| Female                                         | 239 | 64 |
| Male                                           | 136 | 36 |
| Other                                          | 1   | <1 |
| <b>Age group</b>                               |     |    |
| 17-19                                          | 95  | 25 |
| 20-24                                          | 222 | 59 |
| 25-37                                          | 60  | 16 |
| Attends secular university                     | 292 | 77 |
| Attends private university                     | 262 | 63 |
| <b>Degree pursuit</b>                          |     |    |
| Midwifery/Obstetrics                           | 94  | 25 |
| Medicine-Undecided specialty                   | 186 | 49 |
| Medicine-Gynecology specialty                  | 97  | 26 |
| <b>University year</b>                         |     |    |
| 1st-2nd                                        | 163 | 43 |
| 3rd-4th                                        | 127 | 34 |
| 5th-6th                                        | 47  | 12 |
| Last year/Just graduated                       | 40  | 11 |
| <b>Born in Chile</b>                           | 368 | 98 |
| <b>Region where graduated high school</b>      |     |    |
| Santiago metropolitan region                   | 285 | 76 |
| Northern Chile                                 | 34  | 9  |
| Southern Chile                                 | 54  | 14 |
| Other country                                  | 4   | 1  |
| <b>Not married</b>                             | 369 | 98 |
| <b>Political affiliation</b>                   |     |    |
| Right/Center right                             | 95  | 25 |
| Center                                         | 32  | 8  |
| Center left/left                               | 171 | 45 |
| None                                           | 79  | 21 |
| <b>Frequency of religious attendance</b>       |     |    |
| Once a week/2-3 times a month                  | 43  | 12 |
| Once a month/2-3 times a year                  | 64  | 17 |
| Hardly ever/never                              | 270 | 72 |
| <b>Religion</b>                                |     |    |
| Catholic                                       | 143 | 38 |
| Evangelical/Protestant                         | 16  | 4  |
| Other                                          | 16  | 4  |
| None/Atheist/Agnostic                          | 202 | 54 |
| <b>Lived one year or more outside of Chile</b> | 23  | 6  |
| <b>Type of high school attended</b>            |     |    |
| Public                                         | 73  | 19 |
| Private (subsidized)                           | 140 | 37 |
| Private (self-paid)                            | 164 | 44 |

Table 2. Students' views about whether their university should train medical and midwifery students on abortion provision, N=309

|                                                                   | Total<br>(n) % | Attends<br>secular<br>university |      | Degree Pursuit                            |                                      |           |
|-------------------------------------------------------------------|----------------|----------------------------------|------|-------------------------------------------|--------------------------------------|-----------|
|                                                                   |                | No                               | Yes  | Medicine-<br>undecided<br>specialty (Ref) | Medicine-<br>gynecology<br>specialty | Midwifery |
| Believes their university should<br>provide abortion training to: |                |                                  |      |                                           |                                      |           |
| Medical students in general                                       | (216) 70%      | 54%                              | 74%* | 73%                                       | 80%                                  | 54%*      |
| Medical students-gynecology<br>specialty                          | (243) 79%      | 67%                              | 82%* | 76%                                       | 80%                                  | 83%       |
| Midwifery students                                                | (240) 78%      | 58%                              | 83%* | 75%                                       | 75%                                  | 87%*      |
| None of the above                                                 | (16) 5%        | 21%                              | <1%* | 7%                                        | 1%                                   | 7%        |

\*p<.05, based on mixed effect logistic regression analyses accounting for clustering by university. There were 68 missing responses to the question on whether their university should provide abortion training to their students.



Table 3. Respondent attitudes, concerns and intentions to provide abortion-related services

|                                                                                     | Total     | Attends secular university |            | Degree pursuit                     |                               |           |
|-------------------------------------------------------------------------------------|-----------|----------------------------|------------|------------------------------------|-------------------------------|-----------|
|                                                                                     |           | No                         | Yes        | Medicine-undecided specialty –Ref. | Medicine-Gynecology specialty | Midwifery |
| <b>Concerns about providing abortion services, n=377</b>                            |           |                            |            |                                    |                               |           |
| Overall concerns scale (1-5), alpha=.81, mean(SD)                                   | 2.01(0.8) | 2.59(0.8)                  | 1.84(0.8)* | 1.92(0.8)                          | 2.02(0.8)                     | 2.19(0.9) |
| Percent strongly agree/agree:                                                       |           |                            |            |                                    |                               |           |
| It is against my personal values                                                    | 32        | 62                         | 23*        | 28                                 | 31                            | 39        |
| I fear that I would have legal problems                                             | 23        | 33                         | 20*        | 20                                 | 25                            | 29        |
| It is against my religious beliefs                                                  | 18        | 42                         | 11*        | 16                                 | 18                            | 22        |
| It is outside of my scope of practice                                               | 15        | 45                         | 7*         | 14                                 | 8                             | 25        |
| I fear that my family or I may be harassed and/or threatened                        | 10        | 11                         | 10         | 11                                 | 9                             | 10        |
| I may be ostracized/discriminated by my colleagues                                  | 6         | 7                          | 5          | 5                                  | 7                             | 5         |
| I fear of being rejected by my family or friends                                    | 7         | 8                          | 7          | 6                                  | 9                             | 7         |
| Has at least one or more concern                                                    | 50        | 76                         | 42*        | 44                                 | 51                            | 60        |
| <b>Moral views about abortion provision, n=344</b>                                  |           |                            |            |                                    |                               |           |
| Overall moral views scale (1-5), alpha=0.85, mean (SD)                              | 3.74(1.0) | 2.92(1.0)                  | 3.97(0.8)* | 3.78(0.9)                          | 3.84(0.9)                     | 3.55(1.1) |
| Percent strongly agree/agree:                                                       |           |                            |            |                                    |                               |           |
| The needs of a patient are more important than the beliefs of a clinician           | 77        | 51                         | 84*        | 76                                 | 79                            | 76        |
| Abortion should be covered as part of public health services                        | 61        | 30                         | 70*        | 63                                 | 68                            | 51        |
| Providing abortions is a positive contribution to society                           | 57        | 26                         | 66*        | 62                                 | 67                            | 37        |
| Clinicians have the responsibility to counsel patients against having an abortion-R | 18        | 34                         | 14*        | 15                                 | 18                            | 26        |
| I feel that providing abortions is morally wrong-R                                  | 16        | 35                         | 10*        | 15                                 | 13                            | 20        |
| <b>Intentions to provide abortion, n=377</b>                                        |           |                            |            |                                    |                               |           |
| Overall intentions scale (1-4), scale alpha=.82, mean (SD)                          | 2.79(0.8) | 2.11(0.8)                  | 2.99(0.6)* | 2.85(0.8)                          | 2.86(0.8)                     | 2.61(0.8) |
| Percent strongly agree/agree:                                                       |           |                            |            |                                    |                               |           |
| I plan to become trained to provide abortion services                               | 69        | 38                         | 78*        | 71                                 | 70                            | 63        |
| I would try to discourage a patient from seeking abortion-R                         | 21        | 51                         | 13*        | 16                                 | 24*                           | 29        |
| I will try to convince other doctors to provide abortions                           | 21        | 8                          | 25*        | 24                                 | 26                            | 11*       |
| I will not provide abortions under any circumstances-R                              | 20        | 47                         | 13*        | 18                                 | 14                            | 31        |

Ref. =Referent group; SD=Standard deviation; \*p<.05 based on unadjusted analyses; R. =Reverse coded.

Table 4. Factors associated with concerns and views about providing abortion-related services, according to multivariable regression analyses

|                                     | Has one or more concern about abortion provision |      |              | Has morally favorable views about abortion provision |       |               |
|-------------------------------------|--------------------------------------------------|------|--------------|------------------------------------------------------|-------|---------------|
|                                     | %                                                | aOR  | 95% CI       | mean                                                 | Beta  | [95% CI]      |
| University type                     |                                                  |      |              |                                                      |       |               |
| Secular                             | <b>42*</b>                                       | 0.47 | [0.23,0.95]  | <b>3.97*</b>                                         | 0.52  | [0.32,0.72]   |
| Religiously affiliated (Ref.)       | 76                                               |      |              | 2.92                                                 |       |               |
| Gender                              |                                                  |      |              |                                                      |       |               |
| Female                              | 52.5                                             | 1.13 | [0.65,1.95]  | <b>3.78*</b>                                         | 0.21  | [0.05,0.37]   |
| Male/Other (Ref.)                   | 45.6                                             |      |              | 3.66                                                 |       |               |
| Age group                           |                                                  |      |              |                                                      |       |               |
| 17-19                               | 48                                               | 0.71 | [0.34,1.48]  | 3.66                                                 | 0.02  | [-0.19,0.23]  |
| 20-24 (Ref.)                        | 51                                               |      |              | 3.80                                                 |       |               |
| 25-37                               | 47                                               | 0.65 | [0.28,1.49]  | 3.63                                                 | -0.22 | [-0.46,0.01]  |
| Degree pursuit                      |                                                  |      |              |                                                      |       |               |
| Medicine-undecided specialty (Ref.) | 44                                               |      |              | 3.78                                                 |       |               |
| Medicine-Gynecology specialty       | 51                                               | 1.29 | [0.71,2.33]  | 3.84                                                 | 0.02  | [-0.15,0.20]  |
| Midwifery                           | 60                                               | 1.16 | [0.58,2.30]  | 3.55                                                 | -0.12 | [-0.32,0.08]  |
| Where completed high school         |                                                  |      |              |                                                      |       |               |
| Santiago metropolitan region        | 50                                               | 1.10 | [0.62,1.93]  | <b>3.77*</b>                                         | 0.19  | [0.02,0.36]   |
| Other location (Ref.)               | 49                                               |      |              | 3.62                                                 |       |               |
| Political affiliation               |                                                  |      |              |                                                      |       |               |
| Center/None (Ref.)                  | 32                                               |      |              | 3.71                                                 |       |               |
| Right/Center right                  | <b>81*</b>                                       | 2.96 | [1.42,6.19]  | <b>2.88*</b>                                         | -0.52 | [-0.72,-0.31] |
| Center left/left                    | 52                                               | 0.61 | [0.34,1.10]  | <b>4.21*</b>                                         | 0.23  | [0.05,0.41]   |
| Religion                            |                                                  |      |              |                                                      |       |               |
| Catholic or other religion (Ref.)   | 71                                               |      |              | 3.26                                                 |       |               |
| None                                | <b>31*</b>                                       | 0.48 | [0.26,0.89]  | <b>3.20*</b>                                         | 0.22  | [0.03,0.41]   |
| Frequency of religious attendance   |                                                  |      |              |                                                      |       |               |
| Hardly ever/never (Ref.)            | 39                                               |      |              | 4.04                                                 |       |               |
| Once a month/2-3 times a year       | 71                                               | 1.85 | [0.83,4.11]  | 3.30                                                 | -0.20 | [-0.44,0.04]  |
| Once a week/2-3 times a month       | <b>88*</b>                                       | 5.14 | [1.73,15.26] | <b>2.53*</b>                                         | -0.91 | [-1.16,-0.65] |
| Year in school                      |                                                  |      |              |                                                      |       |               |
| 1st-2nd (Ref.)                      | 52                                               |      |              | 3.64                                                 |       |               |
| 3rd-4th                             | 50                                               | 0.90 | [0.45,1.79]  | 3.78                                                 | 0.14  | [-0.06,0.34]  |
| 5th-7th/just graduated              | 45                                               | 0.73 | [0.31,1.73]  | <b>3.88*</b>                                         | 0.34  | [0.09,0.58]   |
| Type of high school attended        |                                                  |      |              |                                                      |       |               |
| Public (Ref.)                       | 35.6                                             |      |              | 3.96                                                 |       |               |
| Private-subsidized                  | 52.2                                             | 1.90 | [0.96,3.75]  | 3.87                                                 | -0.03 | [-0.23,0.16]  |
| Private-self-paid                   | 54.3                                             | 0.95 | [0.46,1.94]  | 3.53                                                 | 0.05  | [-0.16,0.25]  |

\*p<.05; Ref. =Referent group; aOR: Adjusted odds ratios; CI: Confidence Intervals

Table 5. Factors associated with intentions to provide abortion-related services, according to multivariable linear and logistic regression analyses

|                                                      | Intentions to provide abortion services scale |       |               | Plans to get trained to provide abortion services |      |             |
|------------------------------------------------------|-----------------------------------------------|-------|---------------|---------------------------------------------------|------|-------------|
|                                                      | mean                                          | Beta  | 95% CI        | %                                                 | aOR  | 95% CI      |
| University type                                      |                                               |       |               |                                                   |      |             |
| Secular                                              | <b>2.99*</b>                                  | 0.47  | [0.31,0.63]   | <b>78*</b>                                        | 2.74 | [1.38,5.43] |
| Religiously affiliated (Reference)                   | 2.11                                          |       |               | 38                                                |      |             |
| Gender                                               |                                               |       |               |                                                   |      |             |
| Female                                               | 2.80                                          | 0.09  | [-0.04,0.21]  | 70                                                | 1.64 | [0.88,3.05] |
| Male/Other (Reference)                               | 2.78                                          |       |               | 66                                                |      |             |
| Age group                                            |                                               |       |               |                                                   |      |             |
| 17-19                                                | 2.75                                          | 0.05  | [-0.11,0.22]  | 67                                                | 1.30 | [0.59,2.88] |
| 20-24 (Ref)                                          | 2.87                                          |       |               | 73                                                |      |             |
| 25-37                                                | <b>2.58*</b>                                  | -0.29 | [-0.47,-0.10] | <b>53*</b>                                        | 0.35 | [0.14,0.87] |
| Degree pursuit                                       |                                               |       |               |                                                   |      |             |
| Medicine-undecided specialty (Reference)             | 2.85                                          |       |               | 71                                                |      |             |
| Medicine-Gynecology specialty                        | 2.86                                          | -0.01 | [-0.15,0.12]  | 70                                                | 0.96 | [0.48,1.90] |
| Midwifery                                            | 2.61                                          | -0.10 | [-0.26,0.06]  | 63                                                | 0.80 | [0.36,1.79] |
| Where completed high school                          |                                               |       |               |                                                   |      |             |
| Santiago metropolitan region                         | 2.80                                          | 0.06  | [-0.06,0.19]  | 69                                                | 1.14 | [0.61,2.16] |
| Other location (Reference)                           | 2.77                                          |       |               | 67                                                |      |             |
| Political affiliation                                |                                               |       |               |                                                   |      |             |
| Center/None (Reference)                              | 2.77                                          |       |               | 68                                                |      |             |
| Right/Center right                                   | <b>2.10*</b>                                  | -0.42 | [-0.58,-0.26] | <b>37*</b>                                        | 0.45 | [0.22,0.90] |
| Center left/left                                     | <b>3.20</b>                                   | 0.20  | [0.06,0.34]   | <b>87*</b>                                        | 2.22 | [1.01,4.07] |
| Religion                                             |                                               |       |               |                                                   |      |             |
| Catholic or other religion (Reference)               | 2.39                                          |       |               | 51                                                |      |             |
| None                                                 | <b>3.14*</b>                                  | 0.24  | [0.09,0.39]   | 84                                                | 1.49 | [0.74,3.01] |
| Frequency of religious attendance                    |                                               |       |               |                                                   |      |             |
| Hardly ever/never (Reference)                        | 3.03                                          |       |               | 80                                                |      |             |
| Once a month/2-3 times a year                        | 2.43                                          | -0.13 | [-0.31,0.06]  | 50                                                | 0.49 | [0.21,1.12] |
| Once a week/2-3 times a month                        | <b>1.88*</b>                                  | -0.60 | [-0.80,-0.40] | <b>26*</b>                                        | 0.16 | [0.06,0.41] |
| Year in school                                       |                                               |       |               |                                                   |      |             |
| 1 <sup>st</sup> -2 <sup>nd</sup> year (Reference)    | 2.71                                          |       |               | 65                                                |      |             |
| 3 <sup>rd</sup> -4 <sup>th</sup> year                | <b>2.90*</b>                                  | 0.17  | [0.02,0.33]   | <b>76*</b>                                        | 2.48 | [1.09,5.28] |
| 5 <sup>th</sup> -7 <sup>th</sup> year/just graduated | <b>2.81*</b>                                  | 0.26  | [0.06,0.46]   | 64                                                | 2.18 | [0.78,6.13] |
| Type of high school attended                         |                                               |       |               |                                                   |      |             |
| Public (Reference)                                   | 2.95                                          |       |               | 84                                                |      |             |
| Private-subsidized                                   | 2.88                                          | 0.00  | [-0.15,0.15]  | <b>70*</b>                                        | 0.37 | [0.13,0.82] |
| Private-self-paid                                    | 2.65                                          | 0.12  | [-0.04,0.27]  | 61                                                | 0.64 | [0.26,1.55] |

\*p&lt;.05; aOR: Adjusted odds ratios; CI: Confidence Intervals

## References

1. Casas Becerra L. Women prosecuted and imprisoned for abortion in Chile. *Reprod Health Matter* 1997;9:29-36.
2. Casas L, Vivaldi L. Abortion in Chile: the practice under a restrictive regime. *Reprod Health Matter* 2014;22(44):70-81. doi: 10.1016/S0968-8080(14)44811-0
3. Center for Reproductive Law & Policy. Women behind bars. New York, NY, 1998.
4. Gonzalez R, Requejo JH, Nien JK, et al. Tackling Health Inequities in Chile: Maternal, Newborn, Infant, and Child Mortality Between 1990 and 2004. *American journal of public health* 2009;99(7):1220-26. doi: 10.2105/AJPH.2008.143578
5. Donoso Siña E. Reducción de la mortalidad materna en Chile de 1990 a 2000. *Rev Panam Salud Publica* 2004;15(5):326-30.
6. Cockrill K, Upadhyay UD, Turan J, et al. The stigma of having an abortion: development of a scale and characteristics of women experiencing abortion stigma. *Perspectives on sexual and reproductive health* 2013;45(2):79-88. doi: 10.1363/4507913 [published Online First: 2013/06/12]
7. Harris LF, Halpern J, Prata N, et al. Conscientious objection to abortion provision: Why context matters. *Global public health* 2018;13(5):556-66. doi: 10.1080/17441692.2016.1229353 [published Online First: 2016/09/13]
8. Wheeler SB, Zullig LL, Reeve BB, et al. Attitudes and intentions regarding abortion provision among medical school students in South Africa. *International perspectives on sexual and reproductive health* 2012;38(3):154-63. doi: 10.1363/3815412 [published Online First: 2012/09/29]
9. Shotorbani S, Zimmerman FJ, Bell JF, et al. Attitudes and intentions of future health care providers toward abortion provision. *Perspectives on sexual and reproductive health* 2004;36(2):58-63. doi: 10.1363/psrh.36.58.04 [published Online First: 2004/05/12]
10. Thomas RG, Norris AH, Gallo MF. Anti-legal attitude toward abortion among abortion patients in the United States. *Contraception* 2017;96(5):357-64. doi: 10.1016/j.contraception.2017.07.166 [published Online First: 2017/08/05]
11. Montero A, Villarroel R. A critical review of conscientious objection and decriminalisation of abortion in Chile. *Journal of medical ethics* 2018;44(4):279-83. doi: 10.1136/medethics-2017-104281
12. Marin C, Segovia M. A la medida perfecta de la UC: Minsal cambia protocolo sobre objeción de conciencia en ley de aborto. *El Mostrador* 2018.
13. Battistelli MF, Magnusson S, Biggs MA, et al. Expanding the Abortion Provider Workforce: A Qualitative Study of Organizations Implementing a New California Policy. *Perspectives on sexual and reproductive health* 2018;50(1):33-39. doi: 10.1363/psrh.12051 [published Online First: 2018/02/15]
14. Block A, Dehlendorf C, Biggs MA, et al. Postgraduate Experiences With an Advanced Reproductive Health and Abortion Training and Leadership Program. *Family medicine* 2017;49(9):706-13.
15. Rubio G. Jorge Villarreal International Plenary: Legal abortion for the first time in 28 years: Translating law into high-quality services National Abortion Federation. Seattle, WA 2018.
16. Corporación Humanas. Realidad del aborto en Chile Revisión de información estadística, . August 2018. <http://www.humanas.cl/?p=17933>.
17. Bennett CL, McDonald DA, Finch A, et al. North Carolina Medical Student Views on Abortion. *N C Med J* 2018;79(1):14-19.
18. Krishnan V. Abortion in Canada: religious and ideological dimensions of women's attitudes. *Social biology* 1991;38(3-4):249-57.
19. Yam EA, Dries-Daffner I, Garcia SG. Abortion opinion research in Latin America and the Caribbean: a review of the literature. *Stud Fam Plann* 2006;37(4):225-40.

- 1  
2  
3 20. Steinauer JE, Turk JK, Preskill F, et al. Impact of partial participation in integrated family planning  
4 training on medical knowledge, patient communication and professionalism. *Contraception*  
5 2014;89(4):278-85. doi: 10.1016/j.contraception.2013.12.012 [published Online First:  
6 2014/03/04]  
7  
8 21. Steinauer JE, Hawkins M, Turk JK, et al. Opting out of abortion training: benefits of partial  
9 participation in a dedicated family planning rotation for ob-gyn residents. *Contraception*  
10 2013;87(1):88-92. doi: 10.1016/j.contraception.2012.09.002  
11  
12 22. Gogna M, Romero M, Ramos S, et al. Abortion in a restrictive legal context: the views of obstetrician-  
13 gynaecologists in Buenos Aires, Argentina. *Reprod Health Matters* 2002;10(19):128-37.  
14 [published Online First: 2002/10/09]  
15  
16  
17  
18  
19  
20  
21  
22  
23  
24  
25  
26  
27  
28  
29  
30  
31  
32  
33  
34  
35  
36  
37  
38  
39  
40  
41  
42  
43  
44  
45  
46  
47  
48  
49  
50  
51  
52  
53  
54  
55  
56  
57  
58  
59  
60

For peer review only

## STROBE Statement—checklist of items that should be included in reports of observational studies

|                              | Item No | Recommendation                                                                                                                                                                                                                                                                                                                                                                                                                                                         | Page No |
|------------------------------|---------|------------------------------------------------------------------------------------------------------------------------------------------------------------------------------------------------------------------------------------------------------------------------------------------------------------------------------------------------------------------------------------------------------------------------------------------------------------------------|---------|
| <b>Title and abstract</b>    | 1       | (a) Indicate the study's design with a commonly used term in the title or the abstract                                                                                                                                                                                                                                                                                                                                                                                 | 1       |
|                              |         | (b) Provide in the abstract an informative and balanced summary of what was done and what was found                                                                                                                                                                                                                                                                                                                                                                    | 3       |
| <b>Introduction</b>          |         |                                                                                                                                                                                                                                                                                                                                                                                                                                                                        |         |
| Background/rationale         | 2       | Explain the scientific background and rationale for the investigation being reported                                                                                                                                                                                                                                                                                                                                                                                   | 4       |
| Objectives                   | 3       | State specific objectives, including any prespecified hypotheses                                                                                                                                                                                                                                                                                                                                                                                                       | 4       |
| <b>Methods</b>               |         |                                                                                                                                                                                                                                                                                                                                                                                                                                                                        |         |
| Study design                 | 4       | Present key elements of study design early in the paper                                                                                                                                                                                                                                                                                                                                                                                                                | 4       |
| Setting                      | 5       | Describe the setting, locations, and relevant dates, including periods of recruitment, exposure, follow-up, and data collection                                                                                                                                                                                                                                                                                                                                        | 4-5     |
| Participants                 | 6       | (a) <i>Cohort study</i> —Give the eligibility criteria, and the sources and methods of selection of participants. Describe methods of follow-up<br><i>Case-control study</i> —Give the eligibility criteria, and the sources and methods of case ascertainment and control selection. Give the rationale for the choice of cases and controls<br><i>Cross-sectional study</i> —Give the eligibility criteria, and the sources and methods of selection of participants | 5       |
|                              |         | (b) <i>Cohort study</i> —For matched studies, give matching criteria and number of exposed and unexposed<br><i>Case-control study</i> —For matched studies, give matching criteria and the number of controls per case                                                                                                                                                                                                                                                 |         |
| Variables                    | 7       | Clearly define all outcomes, exposures, predictors, potential confounders, and effect modifiers. Give diagnostic criteria, if applicable                                                                                                                                                                                                                                                                                                                               | 6-7     |
| Data sources/<br>measurement | 8*      | For each variable of interest, give sources of data and details of methods of assessment (measurement). Describe comparability of assessment methods if there is more than one group                                                                                                                                                                                                                                                                                   | 6-7     |
| Bias                         | 9       | Describe any efforts to address potential sources of bias                                                                                                                                                                                                                                                                                                                                                                                                              | 8       |
| Study size                   | 10      | Explain how the study size was arrived at                                                                                                                                                                                                                                                                                                                                                                                                                              | 4-5     |
| Quantitative variables       | 11      | Explain how quantitative variables were handled in the analyses. If applicable, describe which groupings were chosen and why                                                                                                                                                                                                                                                                                                                                           | 7       |
| Statistical methods          | 12      | (a) Describe all statistical methods, including those used to control for confounding                                                                                                                                                                                                                                                                                                                                                                                  | 7       |
|                              |         | (b) Describe any methods used to examine subgroups and interactions                                                                                                                                                                                                                                                                                                                                                                                                    | none    |
|                              |         | (c) Explain how missing data were addressed                                                                                                                                                                                                                                                                                                                                                                                                                            | 8       |
|                              |         | (d) <i>Cohort study</i> —If applicable, explain how loss to follow-up was addressed<br><i>Case-control study</i> —If applicable, explain how matching of cases and controls was addressed<br><i>Cross-sectional study</i> —If applicable, describe analytical methods taking account of sampling strategy                                                                                                                                                              | 7       |
|                              |         | (e) Describe any sensitivity analyses                                                                                                                                                                                                                                                                                                                                                                                                                                  | none    |

Continued on next page

1  
2  
3  
4  
5  
6  
7  
8  
9  
10  
11  
12  
13  
14  
15  
16  
17  
18  
19  
20  
21  
22  
23  
24  
25  
26  
27  
28  
29  
30  
31  
32  
33  
34  
35  
36  
37  
38  
39  
40  
41  
42  
43  
44  
45  
46  
47  
48  
49  
50  
51  
52  
53  
54  
55  
56  
57  
58  
59  
60

| <b>Results</b>           |     |                                                                                                                                                                                                              |                    |
|--------------------------|-----|--------------------------------------------------------------------------------------------------------------------------------------------------------------------------------------------------------------|--------------------|
| Participants             | 13* | (a) Report numbers of individuals at each stage of study—eg numbers potentially eligible, examined for eligibility, confirmed eligible, included in the study, completing follow-up, and analysed            | 8                  |
|                          |     | (b) Give reasons for non-participation at each stage                                                                                                                                                         | 8                  |
|                          |     | (c) Consider use of a flow diagram                                                                                                                                                                           | none               |
| Descriptive data         | 14* | (a) Give characteristics of study participants (eg demographic, clinical, social) and information on exposures and potential confounders                                                                     | 8                  |
|                          |     | (b) Indicate number of participants with missing data for each variable of interest                                                                                                                          | 8                  |
|                          |     | (c) <i>Cohort study</i> —Summarise follow-up time (eg, average and total amount)                                                                                                                             |                    |
| Outcome data             | 15* | <i>Cohort study</i> —Report numbers of outcome events or summary measures over time                                                                                                                          |                    |
|                          |     | <i>Case-control study</i> —Report numbers in each exposure category, or summary measures of exposure                                                                                                         |                    |
|                          |     | <i>Cross-sectional study</i> —Report numbers of outcome events or summary measures                                                                                                                           | 6                  |
| Main results             | 16  | (a) Give unadjusted estimates and, if applicable, confounder-adjusted estimates and their precision (eg, 95% confidence interval). Make clear which confounders were adjusted for and why they were included | 7-10,<br>15-<br>17 |
|                          |     | (b) Report category boundaries when continuous variables were categorized                                                                                                                                    | 6-7                |
|                          |     | (c) If relevant, consider translating estimates of relative risk into absolute risk for a meaningful time period                                                                                             | N/A                |
| Other analyses           | 17  | Report other analyses done—eg analyses of subgroups and interactions, and sensitivity analyses                                                                                                               | N/A                |
| <b>Discussion</b>        |     |                                                                                                                                                                                                              |                    |
| Key results              | 18  | Summarise key results with reference to study objectives                                                                                                                                                     | 10                 |
| Limitations              | 19  | Discuss limitations of the study, taking into account sources of potential bias or imprecision. Discuss both direction and magnitude of any potential bias                                                   | 12                 |
| Interpretation           | 20  | Give a cautious overall interpretation of results considering objectives, limitations, multiplicity of analyses, results from similar studies, and other relevant evidence                                   | 12                 |
| Generalisability         | 21  | Discuss the generalisability (external validity) of the study results                                                                                                                                        | 12                 |
| <b>Other information</b> |     |                                                                                                                                                                                                              |                    |
| Funding                  | 22  | Give the source of funding and the role of the funders for the present study and, if applicable, for the original study on which the present article is based                                                | 1                  |

\*Give information separately for cases and controls in case-control studies and, if applicable, for exposed and unexposed groups in cohort and cross-sectional studies.

**Note:** An Explanation and Elaboration article discusses each checklist item and gives methodological background and published examples of transparent reporting. The STROBE checklist is best used in conjunction with this article (freely available on the Web sites of PLoS Medicine at <http://www.plosmedicine.org/>, Annals of Internal Medicine at <http://www.annals.org/>, and Epidemiology at <http://www.epidem.com/>). Information on the STROBE Initiative is available at [www.strobe-statement.org](http://www.strobe-statement.org).

# BMJ Open

## Future women's health providers' willingness to provide abortion services following decriminalization of abortion in Chile: a cross-sectional survey

|                                 |                                                                                                                                                                                                                                                                                                                                                                                                                                                                                                                                                                                                                   |
|---------------------------------|-------------------------------------------------------------------------------------------------------------------------------------------------------------------------------------------------------------------------------------------------------------------------------------------------------------------------------------------------------------------------------------------------------------------------------------------------------------------------------------------------------------------------------------------------------------------------------------------------------------------|
| Journal:                        | <i>BMJ Open</i>                                                                                                                                                                                                                                                                                                                                                                                                                                                                                                                                                                                                   |
| Manuscript ID                   | bmjopen-2019-030797.R1                                                                                                                                                                                                                                                                                                                                                                                                                                                                                                                                                                                            |
| Article Type:                   | Original research                                                                                                                                                                                                                                                                                                                                                                                                                                                                                                                                                                                                 |
| Date Submitted by the Author:   | 28-Jun-2019                                                                                                                                                                                                                                                                                                                                                                                                                                                                                                                                                                                                       |
| Complete List of Authors:       | Biggs, M. Antonia; University of California, San Francisco, Advancing New Standards in Reproductive Health<br>Casas, Lidia; Universidad Diego Portales, Human Rights Center, School of Law,<br>Ramm, Alejandra; Universidad Diego Portales, Instituto de Investigacion en Ciencias Sociales<br>Baba, C. Finley; University of California, San Francisco, Advancing New Standards in Reproductive Health<br>Correa, Sara; Universidad Diego Portales, Instituto de Investigacion en Ciencias Sociales<br>Grossman, Daniel; University of California, San Francisco, Advancing New Standards in Reproductive Health |
| <b>Primary Subject Heading</b>: | Obstetrics and gynaecology                                                                                                                                                                                                                                                                                                                                                                                                                                                                                                                                                                                        |
| Secondary Subject Heading:      | Medical education and training                                                                                                                                                                                                                                                                                                                                                                                                                                                                                                                                                                                    |
| Keywords:                       | abortion, Chile, OBSTETRICS, MEDICAL EDUCATION & TRAINING, midwifery                                                                                                                                                                                                                                                                                                                                                                                                                                                                                                                                              |
|                                 |                                                                                                                                                                                                                                                                                                                                                                                                                                                                                                                                                                                                                   |

SCHOLARONE™  
Manuscripts



1  
2  
3 **Title:** Future women's health providers' willingness to provide abortion services following  
4  
5 decriminalization of abortion in Chile: a cross-sectional survey  
6

7 M. Antonia Biggs<sup>a,d</sup>, Lidia Casas<sup>b</sup>, Alejandra Ramm<sup>c</sup>, Finley Baba<sup>a</sup>, Sara Correa<sup>c</sup>, Daniel Grossman<sup>a</sup>  
8  
9

10 <sup>a</sup>Advancing New Standards in Reproductive Health (ANSIRH), Bixby Center for Global Reproductive  
11  
12 Health, Department of Obstetrics, Gynecology and Reproductive Sciences, University of California, San  
13  
14 Francisco  
15

16 <sup>b</sup>Human Rights Center School of Law, University of Diego Portales  
17

18 <sup>c</sup>Institute of Social Science Research (ICSO), University of Diego Portales  
19

20 <sup>d</sup>Corresponding author, University of California, San Francisco, 1330 Broadway, Suite 1100, Oakland, CA  
21  
22 94612 USA phone:1-510-986-8961; email: [antonia.biggs@ucsf.edu](mailto:antonia.biggs@ucsf.edu)  
23  
24  
25  
26  
27

28 **Funding:** This work was supported by a grant from the University of California, San Francisco (UCSF),  
29  
30 National Center of Excellence in Women's Health and an anonymous foundation. Its contents are solely  
31  
32 the responsibility of the authors and do not necessarily represent the official views of the funders. The  
33  
34 funders had no role in the study design, analysis, or interpretation of the findings.  
35  
36

37 **Article type:** Original article  
38

39 **Keywords:** abortion; medical students; midwifery students; Chile  
40

41  
42 **Author contributions:** MAB and LC conceived and designed the study and obtained funding. AR, FB, and  
43  
44 SC participated in study planning, site recruitment, review of data collection instruments, and conducted  
45  
46 data collection. MAB conducted all data analyses and drafted the manuscript. DG helped to obtain  
47  
48 funding. All authors revised and approved the final manuscript.  
49

50  
51 **Conflicts of interest:** All authors state they have no financial conflicts of interest.  
52  
53  
54  
55  
56  
57  
58  
59  
60

1  
2  
3 **Data availability statement:** De-identified data will be made available upon reasonable request.  
4  
5  
6  
7  
8  
9  
10  
11  
12  
13  
14  
15  
16  
17  
18  
19  
20  
21  
22  
23  
24  
25  
26  
27  
28  
29  
30  
31  
32  
33  
34  
35  
36  
37  
38  
39  
40  
41  
42  
43  
44  
45  
46  
47  
48  
49  
50  
51  
52  
53  
54  
55  
56  
57  
58  
59  
60

For peer review only

## Abstract

**Objective:** To assess Chilean medical and midwifery students' attitudes and willingness to become trained to provide abortion care, shortly after abortion was decriminalized in 2017.

**Design:** We fielded a cross-sectional, web-based survey of medical and midwifery students. We used generalized estimating equations to assess differences by type of university and degree sought.

**Setting:** We recruited students from a combination of seven secular, religiously-affiliated, public and private universities that offer midwifery or medical degrees with a specialization in obstetrics and gynecology, located in Santiago, Chile.

**Participants:** Students seeking medical or midwifery degrees at one of seven universities were eligible to participate. We distributed the survey link to medical and midwifery students at these seven universities; 459 eligible students opened the survey link and 377 students completed the survey.

**Primary and secondary outcomes:** Intentions to become trained to provide abortion services was our primary outcome of interest. Secondary outcomes included moral views and concerns about abortion provision.

**Results:** Most students intend to become trained to provide abortion services (69%), 20% reported that they will not provide an abortion under any circumstance, half (50%) had one or more concern about abortion provision and 16% agreed that providing abortions is morally wrong. Most believed that their university should train medical and midwifery students to provide abortion services (70%-78%). Secular university students reported higher intentions to provide abortion services (Beta 0.47, 95% Confidence Interval (CI): 0.31, 0.63), more favorable views (Beta 0.52, CI: 0.32, 0.72), and fewer concerns about abortion provision (aOR 0.47, CI: 0.23, 0.95) than students from religious universities.

**Conclusion:** Medical and midwifery students are interested in receiving training and providing abortion services, and believe their university should provide this training. Integrating high quality training in

1  
2  
3 abortion care into medical and midwifery programs will be critical to ensuring that women receive  
4  
5 timely, nonjudgmental and quality abortion care.  
6  
7

### 8 9 **Strengths and limitations of this study**

- 10  
11 • This is the first study to assess Chilean medical and midwifery students' willingness and concerns  
12 about providing abortion services soon after Chile lifted its complete ban on abortion.  
13  
14
- 15  
16 • This study recruited students from a range of universities including secular, religious, public and  
17 private universities.  
18  
19
- 20  
21 • This study includes important explanatory variables including political affiliation, religion,  
22 frequency of attendance at religious services and year in medical or midwifery school allowing  
23 us to identify whether any of these variables are associated with our outcomes.  
24  
25
- 26  
27 • Our response rate was low and students from religious universities were underrepresented  
28 raising some concerns of response bias.  
29  
30
- 31  
32 • We did not ask students under what circumstances would they consider providing abortion  
33 services, whether they were aware about the change in the law, or the circumstances in which  
34 abortion has currently been decriminalized.  
35  
36  
37  
38  
39  
40  
41  
42  
43  
44  
45  
46  
47  
48  
49  
50  
51  
52  
53  
54  
55  
56  
57  
58  
59  
60

## Introduction

In August 2017, Chile's constitutional tribunal approved allowing abortion when the woman's life is in danger, lethal fetal anomaly, and for pregnancies due to rape. In the 1990s, when abortion was completely banned, abortion providers consisted of a mix of trained and untrained providers, many of whom had low levels of education and literacy, resulting in high rates of maternal mortality due to abortion.<sup>1</sup> During that period, health care providers reported a fear of prosecution when treating women with fetal or maternal complications,<sup>2</sup> and health care providers and hospitals filed the majority of cases against women who had abortions.<sup>3</sup> Since the 1990s to early 2000s, maternal mortality due to abortion has decreased considerably,<sup>4</sup> owing to increased access to contraception, misoprostol, and higher quality post-abortion care.<sup>2 5</sup>

Under the current law, only physicians are authorized to provide abortions and any individual directly involved in the abortion procedure and institutions are permitted to claim conscientious objection refusals. However, objecting providers are required to refer women interested in abortion to a willing provider and to care for women with post-abortion complications. It is legally required that all women seeking abortion be given oral and written information about alternatives to abortion, information about social and financial support programs, and be offered accompaniment (psychological and emotional support) services, before and after the abortion.<sup>6</sup> Soon after legal reform, the Ministry of Health provided resources to clinicians informing them about the requirements around conscientious objection, as well as guidelines around how to provide psychological and emotional support to women seeking abortion.<sup>7</sup> The Ministry of Health also provided a brief list of clinical fetal and maternal indications that allow a woman to obtain an abortion on maternal and fetal health grounds. While the Ministry of Health has provided abortion training to providers throughout the country, it has not disseminated any specific clinical guidelines around abortion provision. Since the first full year of implementation of the law, there have been over 600 legal abortions in the country, the greatest

1  
2  
3 proportion of which are for maternal indications (45%), followed by fetal conditions (40%), and rape  
4  
5 (15%).<sup>6,8</sup>  
6

7  
8 A few studies have examined future providers' attitudes and willingness to provide abortion in  
9  
10 places where abortion has recently been liberalized or abortion is highly restricted. In Ghana, a survey of  
11  
12 final year midwifery students found that, following abortion liberalization, the majority (70%) reported  
13  
14 that they were somewhat or very likely to provide abortion services once they had graduated.<sup>9</sup> The  
15  
16 most common reasons for being unwilling to provide services were personal and religious beliefs.  
17  
18 Shortly after legal reform in Colombia, a majority of medical students (>90%) surveyed supported  
19  
20 abortion decriminalization under the current law, yet few felt prepared to offer abortion care.<sup>10</sup> Similarly  
21  
22 in Ethiopia, a survey of female higher education students, found that only a minority were aware of the  
23  
24 circumstances in which abortion had been recently legalized.<sup>11</sup> In India, medical students also reported  
25  
26 a lack of knowledge about and fear of providing abortion services.<sup>12</sup>  
27  
28  
29

30  
31 Legal reform introduces a new challenge and opportunity for prospective women's health  
32  
33 providers. They must now consider whether or not they are willing to develop their skills in order to fill a  
34  
35 critical service gap, in an environment that lacks experienced clinicians and has limited capacity to  
36  
37 provide abortion services. The extent to which future providers welcome, reject, and/or are concerned  
38  
39 about providing abortion-related care, now that abortion is legally permissible in Chile, is unclear. This  
40  
41 study aims to deepen our understanding of medical and midwifery students' attitudes, concerns, and  
42  
43 willingness to provide abortion-related care, a critical step in identifying the country's future abortion  
44  
45 training needs.  
46  
47

## 48 **Materials and Methods**

### 49 *Study design*

50  
51  
52 We conducted a cross-sectional survey of prospective women's health providers seeking  
53  
54 medical or midwifery degrees at universities located in the metropolitan region of Santiago, Chile's  
55  
56  
57  
58  
59  
60

1  
2  
3 capital. We powered our sample to detect mean differences in abortion attitudes by university type  
4  
5 (secular vs religious university) and degree type (medical vs midwifery). We estimated that a sample of  
6  
7 300, with a minimum group size of 90, could detect a mean difference of 0.45, on a 4-point scale, and as  
8  
9 reported in a published abortion stigma subscale, with a standard deviation of 1.07, and a two-sided  
10  
11 alpha of 5% and 80% power.<sup>13</sup>

### 14 *Recruitment procedures*

16 We selected a combination of seven secular, religiously-affiliated, public and private universities  
17  
18 that offer midwifery or medical degrees with a specialization in obstetrics and gynecology, located in  
19  
20 Santiago, Chile, to serve as recruitment sites. This included seven medical and five midwifery  
21  
22 departments within these seven universities. In Chile, a degree in medicine usually requires seven years  
23  
24 of study; midwifery programs are typically five-year programs that train students in obstetrics, perinatal  
25  
26 health, and neonatology. Midwifery programs are usually located within a university's school of  
27  
28 medicine, nursing, or health sciences, but midwifery is considered a completely separate career from  
29  
30 medicine or nursing. Based on a review of the Ministry of Education and university websites, we  
31  
32 estimated that the seven participating universities serve over 7,000 students seeking medical or  
33  
34 midwifery degrees, representing 72% of medical and 38% of midwifery students in the metropolitan  
35  
36 region of Santiago and 36% of medical and 16% of midwifery students in the country.<sup>14</sup> Among the 7026  
37  
38 medical and midwifery students in our student pool at these seven universities, 65% are at secular  
39  
40 universities, 35% are at religiously-affiliated universities, 80% are medical students, and 20% are  
41  
42 midwifery students.

44 We requested department administrators and student leaders to distribute a survey link to their  
45  
46 medical and midwifery students. Six departments at four universities shared the link with students  
47  
48 directly, through student listservs or department Facebook pages. At the two non-responding  
49  
50 universities, we distributed paper flyers that included the survey link and a QR code to medical and  
51  
52  
53  
54  
55  
56  
57  
58  
59  
60

1  
2  
3 midwifery students. Interested participants were entered into a gift card drawing (worth \$40  
4  
5 USD/24,000 Chilean pesos) of 25 randomly-selected winners. The study protocol received ethical  
6  
7 approval from the University of Diego Portales, Santiago, Chile.  
8

#### 9 10 *Survey administration*

11  
12 We fielded a web-based, anonymous survey from October 2017 to May 2018. Students seeking  
13  
14 a medical or midwifery degree at one of the seven identified universities were eligible to participate.  
15  
16 Interested students reviewed an online consent form, consented, and completed the survey. The survey  
17  
18 assessed students' moral views,<sup>15</sup> intentions,<sup>16</sup> and concerns about providing abortion.<sup>17</sup> We drew items  
19  
20 from the published literature,<sup>15-17</sup> and adapted them to be applicable to university students and in a  
21  
22 context in which provision of abortion had not been previously legal. The final survey tool was then pilot  
23  
24 tested with six students, before distributing it to the full sample.  
25  
26

#### 27 28 *Patient and public involvement*

29  
30 Prior to developing the student survey, we conducted 30 in-depth qualitative in-person  
31  
32 interviews with clinical teaching faculty at the same seven universities where we intended to survey  
33  
34 students, and within the schools' OB/GYN and midwifery departments. Findings from the faculty  
35  
36 interviews, informed the development of the research questions and the development of the student  
37  
38 survey. Before finalizing the survey, we shared an initial draft of survey items with faculty members  
39  
40 teaching in the fields of obstetrics, medical ethics, and midwifery, and with the study team for review  
41  
42 and comment. We have presented a summary of the findings from faculty and students at several  
43  
44 medical and midwifery schools and among reproductive health professionals in Chile, and plan to  
45  
46 continue presenting the results at professional conferences. We did not include patient involvement in  
47  
48 the design of this study.  
49  
50

#### 51 52 *Outcome variables*

53  
54  
55  
56  
57  
58  
59  
60



1  
2  
3 Drawing from the literature of abortion attitudes and intentions to provide abortion, we  
4  
5 identified three abortion-provision domains. We examined five outcomes related to three abortion-  
6  
7 provision domains. We tested the internal consistency reliability of each domain and confirmed that  
8  
9 each of the three domains produced acceptable Cronbach's alpha scores. We derived the concerns  
10  
11 about abortion provision items from a US survey of students enrolled in a health sciences program (i.e.  
12  
13 medicine, nursing, etc.).<sup>17</sup> Items included: "Now that abortion is legal in certain circumstances, to what  
14  
15 extent do the following factors related to abortion provision concern you?" Followed by seven, Likert-  
16  
17 scaled (1-strongly disagree to 5-strongly agree) items: "It is against my personal values", "I fear that I  
18  
19 would have legal problems", "It is against my religious beliefs", "It is outside my scope of practice", "I  
20  
21 fear that either I or my family may be harassed and/or threatened by others", "I may be ostracized by  
22  
23 my colleagues and/or discriminated against in my profession", and "I fear being rejected by my family or  
24  
25 friends". Average scores across items served as our continuous *concerns about abortion provision*  
26  
27 outcome. *Having one or more concern* served as a dichotomous outcome which included anyone who  
28  
29 agreed or strongly agreed with any of these seven items. We adapted moral views about abortion  
30  
31 provision items from a survey instrument developed among clinicians in Ghana.<sup>18</sup> Items included  
32  
33 respondents' level of agreement (1-strongly disagree to 5-strongly agree) with five items: "The needs of  
34  
35 a patient are more important than the beliefs of a clinician", "Abortion should be covered as part of  
36  
37 public health services", "Providing abortions is a positive contribution to society", "Clinicians have a  
38  
39 responsibility to counsel patients against having an abortion" and "I feel that providing abortions is  
40  
41 morally wrong". After reverse coding the latter two items, average scores across items served as a  
42  
43 continuous *morally favorable views about abortion provision* outcome. For intentions to provide  
44  
45 abortion services items were derived from a survey developed for use among medical students in South  
46  
47 Africa.<sup>16</sup> Participants were asked "Now that abortion is legal in some circumstances, how do you think  
48  
49 this will affect your future practice?", and to indicate their level of agreement (1-strongly disagree to 4-  
50  
51  
52  
53  
54  
55  
56  
57  
58  
59  
60

1  
2  
3 strongly agree) with four items: “I intend to become trained to provide abortion services”, “I will try to  
4 convince other doctors to provide abortions”, “If a female patient requested an abortion, I would try to  
5 discourage her from seeking the procedure”, and “I will not provide an abortion under any  
6 circumstance.” After reverse coding the latter two items, average scores served as one continuous  
7 outcome. Endorsement (agreed/strongly agreed) of *I plan to become trained to provide abortion*  
8 *services* served as final dichotomous outcome.

### 16 Independent variables

17  
18  
19 Independent variables included university type (secular or religious), gender, age group, degree  
20 type (medicine-undecided specialty, medicine-obstetrics and gynecology specialty, and midwifery),  
21 political affiliation (none/center, right/center right, and left/center left), religion (Catholic or other  
22 religion vs none/atheist/agnostic), frequency of attendance to religions services, year in  
23 medical/midwifery school, region where student completed high school (Santiago vs other), and as a  
24 proxy for socioeconomic status, type of high school attended (public, private-subsidized, and private-  
25 self-paid).

### 34 Analyses

35  
36  
37 We estimated frequencies for participant and university characteristics (Table 1) and each  
38 abortion provision domain. We present students' views about whether their university should train  
39 medical and midwifery students on abortion provision in Table 2 and internal consistency Cronbach's  
40 alpha reliability coefficients for each outcome domain in Table 3. For multivariable models, we used  
41 linear and logistic general estimating equation (GEE) models accounting for clustering by university  
42 (Tables 4 and 5). To test associations between participant characteristics and our main outcomes, we  
43 selected model covariates known to be associated with abortion attitudes, based on the existing  
44 literature.<sup>19</sup> We conducted all analyses in STATA 14. Significance was reported at  $P \leq 0.05$ .

### 54 **Results**

### Respondent characteristics

The survey link was distributed to 2,148 medical and midwifery students and 459 opened the survey link; we removed 46 surveys due to ineligibility, and 36 surveys that were less than 40% complete or were missing outcome data, leaving a final sample of 377 and a response rate of (18%, 377/2,148). There were no statistically significant differences by gender, religion, age, year in school, university type, type of degree being pursued, or political affiliation between our final sample (n=377) and those with incomplete surveys (n=36). We describe student and university characteristics in Table 1. Most students attended a secular university (77%), 63% a private university, and 75% were seeking a medical degree (49% undecided specialty and 26% with specialization in obstetrics and gynecology). Most students felt that their university should provide abortion training to all medical students (70%), medical students with an Ob/Gyn specialty (79%), and to midwifery students (78%, Table 2). After removing all observations with missing outcome data, there were no missing data for any of the independent variables of interest. However, there were 68 missing responses for the question asking students if their university should provide abortion training to their students.

### Concerns, moral views and intentions to provide abortion-related services

Half (50%) of students agreed/strongly agreed that they had one or more concern about providing abortion-related services. Primary concerns included: providing abortion was against their personal values (32%) or religious beliefs (18%) and a fear of legal problems (23%, Table 3). Overall concerns about providing abortion-related services were significantly higher among students attending religious than those attending secular universities (mean 2.59 vs 1.84,  $p < .05$ ), with no statistically significant differences by the type of degree being pursued.

Over three-quarters (77%) of students agreed/strongly agreed that the needs of a patient are more important than the beliefs of a clinician, 61% agreed that abortion should be covered as part of public health services, 57% agreed that providing abortions is a positive contribution to society, and 16%

1  
2  
3 agreed that providing abortions is morally wrong (Table 3). Students from secular universities were  
4 significantly more likely to hold morally favorable views about abortion provision than students from  
5 religious universities (mean 3.97 vs 2.92,  $p < .05$ ), with no statistically significant differences by type of  
6 degree being pursued.  
7  
8  
9

10  
11  
12 Nearly two-thirds (69%) of students agreed/strongly agreed that they plan to become trained to  
13 provide abortion services but only 21% would try to convince other doctors to provide abortion services.  
14  
15 Approximately one in five students agreed that they would discourage a woman from seeking an  
16 abortion (21%) and that they will not provide an abortion under any circumstance (20%). Students from  
17 secular universities had significantly higher overall intentions to provide abortion-related services than  
18 students from religious universities (mean 2.99 vs. 2.11,  $p < .05$ ). Medical students specializing in  
19 obstetrics and gynecology (24%) were significantly ( $p < .05$ ) more likely than medical students who had  
20 not yet decided on their specialty (10%) to agree they would try to discourage a patient from seeking an  
21 abortion. Midwifery students (11%) were less likely than medical students (24%) to say they would try to  
22 convince other doctors to provide abortions.  
23  
24  
25  
26  
27  
28  
29  
30  
31  
32  
33

34  
35 In multivariable analyses, factors associated with having one or more concern about abortion  
36 provision included having a right/center right political affiliation (aOR 2.96, CI: 1.42, 6.19) and attending  
37 religious services frequently (aOR 5.14, CI: 1.73, 15.26, Table 4). Factors associated with lower odds of  
38 having concerns about abortion provision included attending a secular university (aOR 0.47, CI: 0.23,  
39 0.95) and identifying as atheist, agnostic or of no religion (aOR 0.47, CI: 0.23, 0.95).  
40  
41  
42  
43  
44  
45

46  
47 Factors associated with having morally favorable views about abortion provision included  
48 attending a secular university (Beta 0.52, CI: 0.32, 0.72), being female (Beta 0.21, CI: 0.05, 0.37), having  
49 completed their high school education in Santiago (Beta 0.19, CI: 0.02, 0.36), identifying as left/center  
50 left political affiliation (Beta 0.23, CI: 0.05, 0.41), and being in the last few years of medical/midwifery  
51 school (Beta 0.34, CI: 0.09, 0.58, Table 4). Those who identified as right/center right political affiliation  
52  
53  
54  
55  
56  
57  
58  
59  
60

1  
2  
3 (Beta -0.52, CI: -0.72, -0.31) or attended religious services frequently (Beta -0.91, CI: -1.16, -0.65) were  
4  
5 less likely to hold morally favorable views about abortion provision.  
6

7  
8 Factors associated with overall intentions to provide abortion services and specifically having  
9  
10 plans to get trained to provide abortion services included attending a secular university (Beta 0.47, CI:  
11  
12 0.31, 0.63 and aOR 2.74, CI: 1.38, 5.43, respectively), having a left/center left political affiliation (Beta  
13  
14 0.20, CI: 0.06, 0.34 and aOR 2.22, CI: 1.01, 4.07), and being in the 3<sup>rd</sup> or 4<sup>th</sup> year in medical/midwifery  
15  
16 school (Beta 0.17, CI: 0.02, 0.33 and aOR 2.48, CI: 1.09, 5.28, Table 5). Identifying as atheist, agnostic or  
17  
18 of no religion was associated with higher overall intentions to provide abortion services (Beta 0.24, CI:  
19  
20 0.09, 0.39). Factors associated with fewer overall intentions and plans to become trained to provide  
21  
22 abortion services included being ages 25 and older (Beta -0.29, CI: -0.47, -0.10 and aOR 0.35, CI: 0.14,  
23  
24 0.87), having a right/center right political affiliation (Beta -0.42, CI: -0.58, -0.26 and aOR 0.45, CI: 0.22,  
25  
26 0.90), and attending religious services frequently (Beta -0.60, CI: -0.80, -0.40 and aOR 0.16, CI: 0.06,  
27  
28 0.41).  
29  
30  
31

### 32 Discussion

33  
34 Findings from this study highlight widespread support among prospective women's health  
35  
36 clinicians to build a qualified workforce to provide abortion services under the current law in Chile. The  
37  
38 vast majority of secular and over one-third of religiously-affiliated university students have intentions to  
39  
40 become trained to provide abortion services. Moreover, only one in ten secular university students and  
41  
42 less than half of students at religiously-affiliated universities said they will not provide abortion services  
43  
44 under any circumstance. Most students, even those at religious universities, felt that they should receive  
45  
46 abortion-related training and moral opposition to abortion was low. Religious university students' desire  
47  
48 to receive abortion training is in conflict with the position that some religious universities have taken—  
49  
50 to claim institutional-level refusals to provide abortion care at their hospitals.<sup>20 21</sup>  
51  
52  
53  
54  
55  
56  
57  
58  
59  
60

1  
2  
3 More than half (57%) of students believe providing abortion services is a positive contribution to  
4 society and few (16%) thought that providing abortions is morally wrong. Holding morally favorable  
5 views about abortion provision was higher among students who were further along in their medical and  
6 midwifery training suggesting that experience may impact students' willingness to provide such services.  
7  
8 Studies in Poland, Ghana and South Africa, similarly have found that medical and midwifery students' in  
9 their later years of study had more favorable attitudes about abortion, abortion provision, and were  
10 more willing to provide abortion services, than students in the first few years of study.<sup>9 16 22</sup> Study  
11 participants' views and intentions to become trained to provide abortion services are likely to change  
12 even further once they become practicing clinicians, as organizational barriers and stigma may deter  
13 interested clinicians from abortion provision.<sup>23 24</sup>

14  
15 Along with the high level of support and intentions to become trained to provide abortion  
16 services, over half of students held concerns, mainly related to their personal values and religious  
17 beliefs, but also due to a fear of legal problems and of being harassed or threatened. These concerns  
18 may be well-founded, as evidenced by the public defaming of the physician who performed the first  
19 legal abortion in the country.<sup>25</sup> Furthermore, the broad adoption of conscientious objector status  
20 among clinicians and institutions<sup>26</sup> may be a product of and/or contributor to the stigma of being an  
21 abortion provider. Clinicians in Chile may require extensive support professionally in order to ensure  
22 that they feel safe providing abortion services to women. Access to training programs to reduce  
23 provider stigma around abortion, as well as burnout, such as that offered by the Provider Share  
24 Workshop, are one example of how a future abortion care workforce could be supported.<sup>27</sup>

25  
26 Consistent with numerous studies documenting the relationship between political views,  
27 religiosity and abortion attitudes among medical students, clinicians, and the general public,<sup>28-30</sup> we  
28 found that students' political affiliation and frequency of religious attendance was strongly associated  
29 with students' moral views and willingness to become trained to provide abortion services. Students'

1  
2  
3 religious beliefs are likely to influence their clinical opinions and interactions, and thus they may benefit  
4  
5 from training to ensure that they are able to provide nonjudgmental services. Studies in the United  
6  
7 States have found that Ob/Gyn residents who were morally opposed to abortion but partially  
8  
9 participated in an abortion training program, felt they gained important clinical and professional skills  
10  
11 from the abortion training.<sup>31 32</sup>  
12  
13

14 While there was widespread interest in learning to provide abortion-related services among  
15  
16 medical and midwifery students attending Catholic-affiliated institutions, it is unlikely that these  
17  
18 institutions will ever train their students to provide abortion procedures. Furthermore, while most  
19  
20 midwifery students reported interest in becoming trained to provide abortion care, they currently are  
21  
22 prohibited from performing procedures. However, there is a wide range of abortion-related information  
23  
24 and skills that arguably should be offered as part of any medical or midwifery student curriculum,  
25  
26 irrespective of their religious affiliation or prohibition on abortion provision. Medical and midwifery  
27  
28 schools could train students to give accurate, informed and non-judgmental pregnancy options  
29  
30 counseling, and referrals for abortion care,<sup>33</sup> to provide high quality post-abortion care, including  
31  
32 managing complications and miscarriage management,<sup>34</sup> to develop competencies on how to address  
33  
34 specific patient scenarios related to abortion care, and to offer offsite residency abortion training  
35  
36 programs. The extent to which medical and midwifery programs in Chile are planning to offer abortion  
37  
38 training, if at all, and whether they will require their students to participate at some level, is still unclear.  
39  
40  
41  
42

43 This study had a number of limitations. Our response rate was low, a common characteristic of  
44  
45 web-based surveys and surveys on sensitive topics.<sup>35</sup> Thus, our findings may suffer from response bias.  
46  
47 While this study successfully reached students from secular and religious universities, students from  
48  
49 religious universities were somewhat underrepresented. According to the Ministry of Education,  
50  
51 approximately 35% of the medical and midwifery population within our seven university recruitment  
52  
53 sites are at religiously-affiliated universities, whereas less than one-quarter (23%) of our responding  
54  
55  
56  
57  
58  
59  
60

1  
2  
3 sample came from religiously-affiliated universities.<sup>14</sup> Thus, the views presented here are likely more  
4  
5 supportive of abortion than medical and midwifery students across the country. The lack of statistically  
6  
7 significant differences between participant characteristics and rates of survey completion mitigates  
8  
9 some of these concerns. Furthermore, the significant associations between variables should not be  
10  
11 affected by nonresponse bias. Nonetheless, students' attitudes about abortion provision are similar to  
12  
13 those reported among obstetricians and gynecologists in Argentina,<sup>36</sup> a country that also has very  
14  
15 restrictive abortion laws. Another study limitation lies in that we did not ask students under which of  
16  
17 the three legal grounds they would consider providing abortion services, or whether they were aware  
18  
19 about the change in the law, or the circumstances in which abortion has currently been decriminalized.  
20  
21 Just one year after legal implementation, we find that OB/GYN providers working in public hospitals, are  
22  
23 claiming conscientious objection status to refuse to provide abortion specifically by reason (woman's  
24  
25 health in danger, pregnancy result of rape, or fetal malformation); reasons that were not explored in this  
26  
27 study.<sup>37</sup>  
28  
29  
30  
31

## 32 **Conclusions**

33  
34 This is the first study to assess Chilean medical and midwifery student's willingness to provide  
35  
36 abortion services following legal reform. Students are interested in receiving training and providing  
37  
38 abortion care to women and believe their university should provide this training. Ensuring that high  
39  
40 quality training in abortion care is integrated within medical and midwifery programs will be critical to  
41  
42 ensuring that women receive timely, nonjudgmental and quality abortion care.  
43  
44  
45  
46  
47  
48  
49  
50  
51  
52  
53  
54  
55  
56  
57  
58  
59  
60



Table 1. Participant characteristics (N=377)

|                                           | N   | %  |
|-------------------------------------------|-----|----|
| <b>Gender</b>                             |     |    |
| Female                                    | 239 | 64 |
| Male                                      | 136 | 36 |
| Other                                     | 1   | <1 |
| <b>Age group</b>                          |     |    |
| 17-19                                     | 95  | 25 |
| 20-24                                     | 222 | 59 |
| 25-37                                     | 60  | 16 |
| Attends secular university                | 292 | 77 |
| Attends private university                | 262 | 63 |
| <b>Degree pursuit</b>                     |     |    |
| Midwifery/Obstetrics                      | 94  | 25 |
| Medicine-Undecided specialty              | 186 | 49 |
| Medicine-Gynecology specialty             | 97  | 26 |
| <b>University year</b>                    |     |    |
| 1st-2nd                                   | 163 | 43 |
| 3rd-4th                                   | 127 | 34 |
| 5th-6th                                   | 47  | 12 |
| Last year/Just graduated                  | 40  | 11 |
| Born in Chile                             | 368 | 98 |
| <b>Region where graduated high school</b> |     |    |
| Santiago metropolitan region              | 285 | 76 |
| Northern Chile                            | 34  | 9  |
| Southern Chile                            | 54  | 14 |
| Other country                             | 4   | 1  |
| Not married                               | 369 | 98 |
| <b>Political affiliation</b>              |     |    |
| Right/Center right                        | 95  | 25 |
| Center                                    | 32  | 8  |
| Center left/left                          | 171 | 45 |
| None                                      | 79  | 21 |
| <b>Frequency of religious attendance</b>  |     |    |
| Once a week/2-3 times a month             | 43  | 12 |
| Once a month/2-3 times a year             | 64  | 17 |
| Hardly ever/never                         | 270 | 72 |
| <b>Religion</b>                           |     |    |
| Catholic                                  | 143 | 38 |
| Evangelical/Protestant                    | 16  | 4  |
| Other                                     | 16  | 4  |
| None/Atheist/Agnostic                     | 202 | 54 |
| Lived one year or more outside of Chile   | 23  | 6  |
| <b>Type of high school attended</b>       |     |    |
| Public                                    | 73  | 19 |
| Private (subsidized)                      | 140 | 37 |
| Private (self-paid)                       | 164 | 44 |

Table 2. Students' views about whether their university should train medical and midwifery students on abortion provision, N=309

|                                                                   | Total<br>(n) % | Attends<br>secular<br>university |      | Degree Pursuit                            |                                      |           |
|-------------------------------------------------------------------|----------------|----------------------------------|------|-------------------------------------------|--------------------------------------|-----------|
|                                                                   |                | No                               | Yes  | Medicine-<br>undecided<br>specialty (Ref) | Medicine-<br>gynecology<br>specialty | Midwifery |
| Believes their university should<br>provide abortion training to: |                |                                  |      |                                           |                                      |           |
| Medical students in general                                       | (216) 70%      | 54%                              | 74%* | 73%                                       | 80%                                  | 54%*      |
| Medical students-gynecology<br>specialty                          | (243) 79%      | 67%                              | 82%* | 76%                                       | 80%                                  | 83%       |
| Midwifery students                                                | (240) 78%      | 58%                              | 83%* | 75%                                       | 75%                                  | 87%*      |
| None of the above                                                 | (16) 5%        | 21%                              | <1%* | 7%                                        | 1%                                   | 7%        |

\*p<.05, based on mixed effect logistic regression analyses accounting for clustering by university. There were 68 missing responses to the question on whether their university should provide abortion training to their students.

Table 3. Respondent attitudes, concerns and intentions to become trained to provide abortion services

|                                                                                     | Total     | Attends secular university |            | Degree pursuit                     |                               |           |
|-------------------------------------------------------------------------------------|-----------|----------------------------|------------|------------------------------------|-------------------------------|-----------|
|                                                                                     |           | No                         | Yes        | Medicine-undecided specialty –Ref. | Medicine-Gynecology specialty | Midwifery |
| <b>Concerns about providing abortion services, n=377</b>                            |           |                            |            |                                    |                               |           |
| Overall concerns scale (1-5), alpha=.81, mean(SD)                                   | 2.01(0.8) | 2.59(0.8)                  | 1.84(0.8)* | 1.92(0.8)                          | 2.02(0.8)                     | 2.19(0.9) |
| Percent strongly agree/agree:                                                       |           |                            |            |                                    |                               |           |
| It is against my personal values                                                    | 32        | 62                         | 23*        | 28                                 | 31                            | 39        |
| I fear that I would have legal problems                                             | 23        | 33                         | 20*        | 20                                 | 25                            | 29        |
| It is against my religious beliefs                                                  | 18        | 42                         | 11*        | 16                                 | 18                            | 22        |
| It is outside of my scope of practice                                               | 15        | 45                         | 7*         | 14                                 | 8                             | 25        |
| I fear that my family or I may be harassed and/or threatened                        | 10        | 11                         | 10         | 11                                 | 9                             | 10        |
| I may be ostracized/discriminated by my colleagues                                  | 6         | 7                          | 5          | 5                                  | 7                             | 5         |
| I fear of being rejected by my family or friends                                    | 7         | 8                          | 7          | 6                                  | 9                             | 7         |
| Has at least one or more concern                                                    | 50        | 76                         | 42*        | 44                                 | 51                            | 60        |
| <b>Moral views about abortion provision, n=344</b>                                  |           |                            |            |                                    |                               |           |
| Overall moral views scale (1-5), alpha=0.85, mean (SD)                              | 3.74(1.0) | 2.92(1.0)                  | 3.97(0.8)* | 3.78(0.9)                          | 3.84(0.9)                     | 3.55(1.1) |
| Percent strongly agree/agree:                                                       |           |                            |            |                                    |                               |           |
| The needs of a patient are more important than the beliefs of a clinician           | 77        | 51                         | 84*        | 76                                 | 79                            | 76        |
| Abortion should be covered as part of public health services                        | 61        | 30                         | 70*        | 63                                 | 68                            | 51        |
| Providing abortions is a positive contribution to society                           | 57        | 26                         | 66*        | 62                                 | 67                            | 37        |
| Clinicians have the responsibility to counsel patients against having an abortion-R | 18        | 34                         | 14*        | 15                                 | 18                            | 26        |
| I feel that providing abortions is morally wrong-R                                  | 16        | 35                         | 10*        | 15                                 | 13                            | 20        |
| <b>Intentions to become trained to provide abortion services, n=377</b>             |           |                            |            |                                    |                               |           |
| Overall intentions scale (1-4), scale alpha=.82, mean (SD)                          | 2.79(0.8) | 2.11(0.8)                  | 2.99(0.6)* | 2.85(0.8)                          | 2.86(0.8)                     | 2.61(0.8) |
| Percent strongly agree/agree:                                                       |           |                            |            |                                    |                               |           |
| I intend to become trained to provide abortion services                             | 69        | 38                         | 78*        | 71                                 | 70                            | 63        |
| I would try to discourage a patient from seeking abortion-R                         | 21        | 51                         | 13*        | 16                                 | 24*                           | 29        |
| I will try to convince other doctors to provide abortions                           | 21        | 8                          | 25*        | 24                                 | 26                            | 11*       |
| I will not provide abortions under any circumstances-R                              | 20        | 47                         | 13*        | 18                                 | 14                            | 31        |

Ref. =Referent group; SD=Standard deviation; \*p<.05 based on unadjusted analyses; R. =Reverse coded.

Table 4. Factors associated with concerns and moral views about providing abortion-related services, according to multivariable regression analyses

|                                     | Has one or more concern about abortion provision |      |              | Has morally favorable views about abortion provision |       |               |
|-------------------------------------|--------------------------------------------------|------|--------------|------------------------------------------------------|-------|---------------|
|                                     | %                                                | aOR  | 95% CI       | mean                                                 | Beta  | [95% CI]      |
| University type                     |                                                  |      |              |                                                      |       |               |
| Secular                             | <b>42*</b>                                       | 0.47 | [0.23,0.95]  | <b>3.97*</b>                                         | 0.52  | [0.32,0.72]   |
| Religiously affiliated (Ref.)       | 76                                               |      |              | 2.92                                                 |       |               |
| Gender                              |                                                  |      |              |                                                      |       |               |
| Female                              | 52.5                                             | 1.13 | [0.65,1.95]  | <b>3.78*</b>                                         | 0.21  | [0.05,0.37]   |
| Male/Other (Ref.)                   | 45.6                                             |      |              | 3.66                                                 |       |               |
| Age group                           |                                                  |      |              |                                                      |       |               |
| 17-19                               | 48                                               | 0.71 | [0.34,1.48]  | 3.66                                                 | 0.02  | [-0.19,0.23]  |
| 20-24 (Ref.)                        | 51                                               |      |              | 3.80                                                 |       |               |
| 25-37                               | 47                                               | 0.65 | [0.28,1.49]  | 3.63                                                 | -0.22 | [-0.46,0.01]  |
| Degree pursuit                      |                                                  |      |              |                                                      |       |               |
| Medicine-undecided specialty (Ref.) | 44                                               |      |              | 3.78                                                 |       |               |
| Medicine-Gynecology specialty       | 51                                               | 1.29 | [0.71,2.33]  | 3.84                                                 | 0.02  | [-0.15,0.20]  |
| Midwifery                           | 60                                               | 1.16 | [0.58,2.30]  | 3.55                                                 | -0.12 | [-0.32,0.08]  |
| Where completed high school         |                                                  |      |              |                                                      |       |               |
| Santiago metropolitan region        | 50                                               | 1.10 | [0.62,1.93]  | <b>3.77*</b>                                         | 0.19  | [0.02,0.36]   |
| Other location (Ref.)               | 49                                               |      |              | 3.62                                                 |       |               |
| Political affiliation               |                                                  |      |              |                                                      |       |               |
| Center/None (Ref.)                  | 32                                               |      |              | 3.71                                                 |       |               |
| Right/Center right                  | <b>81*</b>                                       | 2.96 | [1.42,6.19]  | <b>2.88*</b>                                         | -0.52 | [-0.72,-0.31] |
| Center left/left                    | 52                                               | 0.61 | [0.34,1.10]  | <b>4.21*</b>                                         | 0.23  | [0.05,0.41]   |
| Religion                            |                                                  |      |              |                                                      |       |               |
| Catholic or other religion (Ref.)   | 71                                               |      |              | 3.26                                                 |       |               |
| None                                | <b>31*</b>                                       | 0.48 | [0.26,0.89]  | <b>3.20*</b>                                         | 0.22  | [0.03,0.41]   |
| Frequency of religious attendance   |                                                  |      |              |                                                      |       |               |
| Hardly ever/never (Ref.)            | 39                                               |      |              | 4.04                                                 |       |               |
| Once a month/2-3 times a year       | 71                                               | 1.85 | [0.83,4.11]  | 3.30                                                 | -0.20 | [-0.44,0.04]  |
| Once a week/2-3 times a month       | <b>88*</b>                                       | 5.14 | [1.73,15.26] | <b>2.53*</b>                                         | -0.91 | [-1.16,-0.65] |
| Year in school                      |                                                  |      |              |                                                      |       |               |
| 1st-2nd (Ref.)                      | 52                                               |      |              | 3.64                                                 |       |               |
| 3rd-4th                             | 50                                               | 0.90 | [0.45,1.79]  | 3.78                                                 | 0.14  | [-0.06,0.34]  |
| 5th-7th/just graduated              | 45                                               | 0.73 | [0.31,1.73]  | <b>3.88*</b>                                         | 0.34  | [0.09,0.58]   |
| Type of high school attended        |                                                  |      |              |                                                      |       |               |
| Public (Ref.)                       | 35.6                                             |      |              | 3.96                                                 |       |               |
| Private-subsidized                  | 52.2                                             | 1.90 | [0.96,3.75]  | 3.87                                                 | -0.03 | [-0.23,0.16]  |
| Private-self-paid                   | 54.3                                             | 0.95 | [0.46,1.94]  | 3.53                                                 | 0.05  | [-0.16,0.25]  |

\*p<.05; Ref. =Referent group; aOR: Adjusted odds ratios; CI: Confidence Intervals

Table 5. Factors associated with intentions to become trained to provide abortion services, according to multivariable linear and logistic regression analyses

|                                                      | Intentions to provide abortion services scale |       |               | Intends to become trained to provide abortion services |      |             |
|------------------------------------------------------|-----------------------------------------------|-------|---------------|--------------------------------------------------------|------|-------------|
|                                                      | mean                                          | Beta  | 95% CI        | %                                                      | aOR  | 95% CI      |
| University type                                      |                                               |       |               |                                                        |      |             |
| Secular                                              | <b>2.99*</b>                                  | 0.47  | [0.31,0.63]   | <b>78*</b>                                             | 2.74 | [1.38,5.43] |
| Religiously affiliated (Reference)                   | 2.11                                          |       |               | 38                                                     |      |             |
| Gender                                               |                                               |       |               |                                                        |      |             |
| Female                                               | 2.80                                          | 0.09  | [-0.04,0.21]  | 70                                                     | 1.64 | [0.88,3.05] |
| Male/Other (Reference)                               | 2.78                                          |       |               | 66                                                     |      |             |
| Age group                                            |                                               |       |               |                                                        |      |             |
| 17-19                                                | 2.75                                          | 0.05  | [-0.11,0.22]  | 67                                                     | 1.30 | [0.59,2.88] |
| 20-24 (Ref)                                          | 2.87                                          |       |               | 73                                                     |      |             |
| 25-37                                                | <b>2.58*</b>                                  | -0.29 | [-0.47,-0.10] | <b>53*</b>                                             | 0.35 | [0.14,0.87] |
| Degree pursuit                                       |                                               |       |               |                                                        |      |             |
| Medicine-undecided specialty (Reference)             | 2.85                                          |       |               | 71                                                     |      |             |
| Medicine-Gynecology specialty                        | 2.86                                          | -0.01 | [-0.15,0.12]  | 70                                                     | 0.96 | [0.48,1.90] |
| Midwifery                                            | 2.61                                          | -0.10 | [-0.26,0.06]  | 63                                                     | 0.80 | [0.36,1.79] |
| Where completed high school                          |                                               |       |               |                                                        |      |             |
| Santiago metropolitan region                         | 2.80                                          | 0.06  | [-0.06,0.19]  | 69                                                     | 1.14 | [0.61,2.16] |
| Other location (Reference)                           | 2.77                                          |       |               | 67                                                     |      |             |
| Political affiliation                                |                                               |       |               |                                                        |      |             |
| Center/None (Reference)                              | 2.77                                          |       |               | 68                                                     |      |             |
| Right/Center right                                   | <b>2.10*</b>                                  | -0.42 | [-0.58,-0.26] | <b>37*</b>                                             | 0.45 | [0.22,0.90] |
| Center left/left                                     | <b>3.20</b>                                   | 0.20  | [0.06,0.34]   | <b>87*</b>                                             | 2.22 | [1.01,4.07] |
| Religion                                             |                                               |       |               |                                                        |      |             |
| Catholic or other religion (Reference)               | 2.39                                          |       |               | 51                                                     |      |             |
| None                                                 | <b>3.14*</b>                                  | 0.24  | [0.09,0.39]   | 84                                                     | 1.49 | [0.74,3.01] |
| Frequency of religious attendance                    |                                               |       |               |                                                        |      |             |
| Hardly ever/never (Reference)                        | 3.03                                          |       |               | 80                                                     |      |             |
| Once a month/2-3 times a year                        | 2.43                                          | -0.13 | [-0.31,0.06]  | 50                                                     | 0.49 | [0.21,1.12] |
| Once a week/2-3 times a month                        | <b>1.88*</b>                                  | -0.60 | [-0.80,-0.40] | <b>26*</b>                                             | 0.16 | [0.06,0.41] |
| Year in school                                       |                                               |       |               |                                                        |      |             |
| 1 <sup>st</sup> -2 <sup>nd</sup> year (Reference)    | 2.71                                          |       |               | 65                                                     |      |             |
| 3 <sup>rd</sup> -4 <sup>th</sup> year                | <b>2.90*</b>                                  | 0.17  | [0.02,0.33]   | <b>76*</b>                                             | 2.48 | [1.09,5.28] |
| 5 <sup>th</sup> -7 <sup>th</sup> year/just graduated | <b>2.81*</b>                                  | 0.26  | [0.06,0.46]   | 64                                                     | 2.18 | [0.78,6.13] |
| Type of high school attended                         |                                               |       |               |                                                        |      |             |
| Public (Reference)                                   | 2.95                                          |       |               | 84                                                     |      |             |
| Private-subsidized                                   | 2.88                                          | 0.00  | [-0.15,0.15]  | <b>70*</b>                                             | 0.37 | [0.13,0.82] |
| Private-self-paid                                    | 2.65                                          | 0.12  | [-0.04,0.27]  | 61                                                     | 0.64 | [0.26,1.55] |

\*p&lt;.05; aOR: Adjusted odds ratios; CI: Confidence Intervals

## References

1. Casas Becerra L. Women prosecuted and imprisoned for abortion in Chile. *Reprod Health Matter* 1997;9:29-36.
2. Casas L, Vivaldi L. Abortion in Chile: the practice under a restrictive regime. *Reprod Health Matter* 2014;22(44):70-81. doi: 10.1016/S0968-8080(14)44811-0
3. Center for Reproductive Law & Policy. Women behind bars. New York, NY, 1998.
4. Gonzalez R, Requejo JH, Nien JK, et al. Tackling Health Inequities in Chile: Maternal, Newborn, Infant, and Child Mortality Between 1990 and 2004. *American journal of public health* 2009;99(7):1220-26. doi: 10.2105/AJPH.2008.143578
5. Donoso Siña E. Reducción de la mortalidad materna en Chile de 1990 a 2000. *Rev Panam Salud Publica* 2004;15(5):326–30.
6. Ministerio de salud. Ley 21.030: Regla la despenalización de la interrupción voluntaria del embarazo en tres causales, 2017.
7. Ministerio de salud. Orientaciones técnicas, Acogida y acompañamiento psicosocial en el marco de la ley 21.030, que despenaliza la interrupción voluntaria del embarazo en tres causales: Gobierno de Chile, 2018.
8. Ministerio de salud. IVE: Reporte mensual actualizado al 25 de diciembre de 2018. <https://www.minsal.cl/ive-reporte-mensual-actualizado/>, 2018.
9. Rominski SD, Lori J, Nakua E, et al. What makes a likely abortion provider? Evidence from a nationwide survey of final-year students at Ghana's public midwifery training colleges. *Contraception* 2016;93(3):226-32. doi: <https://doi.org/10.1016/j.contraception.2015.11.007>
10. Quintero-Roa EM, Ochoa-Vera ME. [Knowledge and attitudes of medical students on decriminalized induced abortion]. *Rev Salud Publica* 2015;17(6):912-24.
11. Geleto A, Markos J. Awareness of female students attending higher educational institutions toward legalization of safe abortion and associated factors, Harari Region, Eastern Ethiopia: a cross sectional study. *Reproductive Health* 2015;12(1):19. doi: 10.1186/s12978-015-0006-y
12. Sjostrom S, Essen B, Gemzell-Danielsson K, et al. Medical students are afraid to include abortion in their future practices: in-depth interviews in Maharashtra, India. *BMC Med Educ* 2016;16(8):016-0532.
13. Cockrill K, Upadhyay UD, Turan J, et al. The stigma of having an abortion: development of a scale and characteristics of women experiencing abortion stigma. *Perspectives on sexual and reproductive health* 2013;45(2):79-88. doi: 10.1363/4507913 [published Online First: 2013/06/12]
14. Consejo Nacional de Educacion. Matrícula Instituciones/Programas Educación Superior. <https://www.cned.cl/indices/matricula-institucionesprogramas-educacion-superior>, 2018.
15. Harris LF, Halpern J, Prata N, et al. Conscientious objection to abortion provision: Why context matters. *Global public health* 2018;13(5):556-66. doi: 10.1080/17441692.2016.1229353 [published Online First: 2016/09/13]
16. Wheeler SB, Zullig LL, Reeve BB, et al. Attitudes and intentions regarding abortion provision among medical school students in South Africa. *International perspectives on sexual and reproductive health* 2012;38(3):154-63. doi: 10.1363/3815412 [published Online First: 2012/09/29]
17. Shotorbani S, Zimmerman FJ, Bell JF, et al. Attitudes and intentions of future health care providers toward abortion provision. *Perspectives on sexual and reproductive health* 2004;36(2):58-63. doi: 10.1363/psrh.36.58.04 [published Online First: 2004/05/12]
18. Harris LF, Awoonor-Williams JK, Gerdtts C, et al. Development of a Conceptual Model and Survey Instrument to Measure Conscientious Objection to Abortion Provision. *PLoS one* 2016;11(10):e0164368. doi: 10.1371/journal.pone.0164368

19. Thomas RG, Norris AH, Gallo MF. Anti-legal attitude toward abortion among abortion patients in the United States. *Contraception* 2017;96(5):357-64. doi: 10.1016/j.contraception.2017.07.166 [published Online First: 2017/08/05]
20. Montero A, Villarroel R. A critical review of conscientious objection and decriminalisation of abortion in Chile. *Journal of medical ethics* 2018;44(4):279-83. doi: 10.1136/medethics-2017-104281
21. Marin C, Segovia M. A la medida perfecta de la UC: Minsal cambia protocolo sobre objeción de conciencia en ley de aborto. *El Mostrador* 2018.
22. Michalik A, Zdun-Ryzewska A, Pieta B, et al. Multicenter study on midwifery students' attitudes towards abortion and it's place in their future practice - Comparison of respondents at early and late stages of the university education. *Nurse Educ Pract* 2019;35:42-47.
23. Battistelli MF, Magnusson S, Biggs MA, et al. Expanding the Abortion Provider Workforce: A Qualitative Study of Organizations Implementing a New California Policy. *Perspectives on sexual and reproductive health* 2018;50(1):33-39. doi: 10.1363/psrh.12051 [published Online First: 2018/02/15]
24. Block A, Dehlendorf C, Biggs MA, et al. Postgraduate Experiences With an Advanced Reproductive Health and Abortion Training and Leadership Program. *Family medicine* 2017;49(9):706-13.
25. Rubio G. Jorge Villarreal International Plenary: Legal abortion for the first time in 28 years: Translating law into high-quality services National Abortion Federation. Seattle, WA 2018.
26. Corporación Humanas. Realidad del aborto en Chile Revisión de información estadística, . August 2018. <http://www.humanas.cl/?p=17933>.
27. Debbink MLP, Hassinger JA, Martin LA, et al. Experiences With the Providers Share Workshop Method: Abortion Worker Support and Research in Tandem. *Qual Health Res* 2016;26(13):1823-37. doi: 10.1177/1049732316661166 [published Online First: 2016/08/09]
28. Bennett CL, McDonald DA, Finch A, et al. North Carolina Medical Student Views on Abortion. *N C Med J* 2018;79(1):14-19.
29. Krishnan V. Abortion in Canada: religious and ideological dimensions of women's attitudes. *Social biology* 1991;38(3-4):249-57.
30. Yam EA, Dries-Daffner I, Garcia SG. Abortion opinion research in Latin America and the Caribbean: a review of the literature. *Stud Fam Plann* 2006;37(4):225-40.
31. Steinauer JE, Turk JK, Preskill F, et al. Impact of partial participation in integrated family planning training on medical knowledge, patient communication and professionalism. *Contraception* 2014;89(4):278-85. doi: 10.1016/j.contraception.2013.12.012 [published Online First: 2014/03/04]
32. Steinauer JE, Hawkins M, Turk JK, et al. Opting out of abortion training: benefits of partial participation in a dedicated family planning rotation for ob-gyn residents. *Contraception* 2013;87(1):88-92. doi: 10.1016/j.contraception.2012.09.002
33. O'Donnell J, Holt K, Nobel K, et al. Evaluation of a Training for Health and Social Service Providers on Abortion Referral-Making. *Matern Child Health J* 2018;22(10):1369-76.
34. Wallace RR, Goodman S, Freedman LR, et al. Counseling women with early pregnancy failure: Utilizing evidence, preserving preference. *Patient education and counseling* 2010;81(3):454-61. doi: <https://doi.org/10.1016/j.pec.2010.10.031>
35. Edwards PJ, Roberts I, Clarke MJ, et al. Methods to increase response to postal and electronic questionnaires. *The Cochrane database of systematic reviews* 2009;8(3)
36. Gogna M, Romero M, Ramos S, et al. Abortion in a restrictive legal context: the views of obstetrician-gynaecologists in Buenos Aires, Argentina. *Reprod Health Matters* 2002;10(19):128-37. [published Online First: 2002/10/09]

1  
2  
3 37. Corporacion Humanas. Implementación de la Ley N° 21.030 que regula la despenalización de la  
4 interrupción voluntaria del embarazo en tres causales: Objeción de conciencia en hospitales  
5 públicos y en instituciones y su impacto en el ejercicio de derechos de las mujeres y niñas, 2018.  
6  
7  
8  
9  
10  
11  
12  
13  
14  
15  
16  
17  
18  
19  
20  
21  
22  
23  
24  
25  
26  
27  
28  
29  
30  
31  
32  
33  
34  
35  
36  
37  
38  
39  
40  
41  
42  
43  
44  
45  
46  
47  
48  
49  
50  
51  
52  
53  
54  
55  
56  
57  
58  
59  
60

For peer review only



## STROBE Statement—checklist of items that should be included in reports of observational studies

|                              | Item No | Recommendation                                                                                                                                                                                                                                                                                                                                                                                                                                                         | Page No |
|------------------------------|---------|------------------------------------------------------------------------------------------------------------------------------------------------------------------------------------------------------------------------------------------------------------------------------------------------------------------------------------------------------------------------------------------------------------------------------------------------------------------------|---------|
| <b>Title and abstract</b>    | 1       | (a) Indicate the study's design with a commonly used term in the title or the abstract                                                                                                                                                                                                                                                                                                                                                                                 | 1       |
|                              |         | (b) Provide in the abstract an informative and balanced summary of what was done and what was found                                                                                                                                                                                                                                                                                                                                                                    | 3       |
| <b>Introduction</b>          |         |                                                                                                                                                                                                                                                                                                                                                                                                                                                                        |         |
| Background/rationale         | 2       | Explain the scientific background and rationale for the investigation being reported                                                                                                                                                                                                                                                                                                                                                                                   | 4       |
| Objectives                   | 3       | State specific objectives, including any prespecified hypotheses                                                                                                                                                                                                                                                                                                                                                                                                       | 4       |
| <b>Methods</b>               |         |                                                                                                                                                                                                                                                                                                                                                                                                                                                                        |         |
| Study design                 | 4       | Present key elements of study design early in the paper                                                                                                                                                                                                                                                                                                                                                                                                                | 4       |
| Setting                      | 5       | Describe the setting, locations, and relevant dates, including periods of recruitment, exposure, follow-up, and data collection                                                                                                                                                                                                                                                                                                                                        | 4-5     |
| Participants                 | 6       | (a) <i>Cohort study</i> —Give the eligibility criteria, and the sources and methods of selection of participants. Describe methods of follow-up<br><i>Case-control study</i> —Give the eligibility criteria, and the sources and methods of case ascertainment and control selection. Give the rationale for the choice of cases and controls<br><i>Cross-sectional study</i> —Give the eligibility criteria, and the sources and methods of selection of participants | 5       |
|                              |         | (b) <i>Cohort study</i> —For matched studies, give matching criteria and number of exposed and unexposed<br><i>Case-control study</i> —For matched studies, give matching criteria and the number of controls per case                                                                                                                                                                                                                                                 |         |
| Variables                    | 7       | Clearly define all outcomes, exposures, predictors, potential confounders, and effect modifiers. Give diagnostic criteria, if applicable                                                                                                                                                                                                                                                                                                                               | 6-7     |
| Data sources/<br>measurement | 8*      | For each variable of interest, give sources of data and details of methods of assessment (measurement). Describe comparability of assessment methods if there is more than one group                                                                                                                                                                                                                                                                                   | 6-7     |
| Bias                         | 9       | Describe any efforts to address potential sources of bias                                                                                                                                                                                                                                                                                                                                                                                                              | 8       |
| Study size                   | 10      | Explain how the study size was arrived at                                                                                                                                                                                                                                                                                                                                                                                                                              | 4-5     |
| Quantitative variables       | 11      | Explain how quantitative variables were handled in the analyses. If applicable, describe which groupings were chosen and why                                                                                                                                                                                                                                                                                                                                           | 7       |
| Statistical methods          | 12      | (a) Describe all statistical methods, including those used to control for confounding                                                                                                                                                                                                                                                                                                                                                                                  | 7       |
|                              |         | (b) Describe any methods used to examine subgroups and interactions                                                                                                                                                                                                                                                                                                                                                                                                    | none    |
|                              |         | (c) Explain how missing data were addressed                                                                                                                                                                                                                                                                                                                                                                                                                            | 8       |
|                              |         | (d) <i>Cohort study</i> —If applicable, explain how loss to follow-up was addressed<br><i>Case-control study</i> —If applicable, explain how matching of cases and controls was addressed<br><i>Cross-sectional study</i> —If applicable, describe analytical methods taking account of sampling strategy                                                                                                                                                              | 7       |
|                              |         | (e) Describe any sensitivity analyses                                                                                                                                                                                                                                                                                                                                                                                                                                  | none    |

Continued on next page

| <b>Results</b>           |     |                                                                                                                                                                                                              |                    |
|--------------------------|-----|--------------------------------------------------------------------------------------------------------------------------------------------------------------------------------------------------------------|--------------------|
| Participants             | 13* | (a) Report numbers of individuals at each stage of study—eg numbers potentially eligible, examined for eligibility, confirmed eligible, included in the study, completing follow-up, and analysed            | 8                  |
|                          |     | (b) Give reasons for non-participation at each stage                                                                                                                                                         | 8                  |
|                          |     | (c) Consider use of a flow diagram                                                                                                                                                                           | none               |
| Descriptive data         | 14* | (a) Give characteristics of study participants (eg demographic, clinical, social) and information on exposures and potential confounders                                                                     | 8                  |
|                          |     | (b) Indicate number of participants with missing data for each variable of interest                                                                                                                          | 8                  |
|                          |     | (c) <i>Cohort study</i> —Summarise follow-up time (eg, average and total amount)                                                                                                                             |                    |
| Outcome data             | 15* | <i>Cohort study</i> —Report numbers of outcome events or summary measures over time                                                                                                                          |                    |
|                          |     | <i>Case-control study</i> —Report numbers in each exposure category, or summary measures of exposure                                                                                                         |                    |
|                          |     | <i>Cross-sectional study</i> —Report numbers of outcome events or summary measures                                                                                                                           | 6                  |
| Main results             | 16  | (a) Give unadjusted estimates and, if applicable, confounder-adjusted estimates and their precision (eg, 95% confidence interval). Make clear which confounders were adjusted for and why they were included | 7-10,<br>15-<br>17 |
|                          |     | (b) Report category boundaries when continuous variables were categorized                                                                                                                                    | 6-7                |
|                          |     | (c) If relevant, consider translating estimates of relative risk into absolute risk for a meaningful time period                                                                                             | N/A                |
| Other analyses           | 17  | Report other analyses done—eg analyses of subgroups and interactions, and sensitivity analyses                                                                                                               | N/A                |
| <b>Discussion</b>        |     |                                                                                                                                                                                                              |                    |
| Key results              | 18  | Summarise key results with reference to study objectives                                                                                                                                                     | 10                 |
| Limitations              | 19  | Discuss limitations of the study, taking into account sources of potential bias or imprecision. Discuss both direction and magnitude of any potential bias                                                   | 12                 |
| Interpretation           | 20  | Give a cautious overall interpretation of results considering objectives, limitations, multiplicity of analyses, results from similar studies, and other relevant evidence                                   | 12                 |
| Generalisability         | 21  | Discuss the generalisability (external validity) of the study results                                                                                                                                        | 12                 |
| <b>Other information</b> |     |                                                                                                                                                                                                              |                    |
| Funding                  | 22  | Give the source of funding and the role of the funders for the present study and, if applicable, for the original study on which the present article is based                                                | 1                  |

\*Give information separately for cases and controls in case-control studies and, if applicable, for exposed and unexposed groups in cohort and cross-sectional studies.

**Note:** An Explanation and Elaboration article discusses each checklist item and gives methodological background and published examples of transparent reporting. The STROBE checklist is best used in conjunction with this article (freely available on the Web sites of PLoS Medicine at <http://www.plosmedicine.org/>, Annals of Internal Medicine at <http://www.annals.org/>, and Epidemiology at <http://www.epidem.com/>). Information on the STROBE Initiative is available at [www.strobe-statement.org](http://www.strobe-statement.org).
